# Supplementary material for: Design, synthesis and structural studies of meta-xylyl linked bis-benzimidazolium salts: potential anticancer agents against ‘human colon cancer’
Source: PubMed Central journal article supplement (PMC3542276; doi:10.1186/1752-153x-6-68), 2012-07-18
Supplement: 1752-153X-6-68-S1.pdf [file 1752-153X-6-68-S1.pdf]

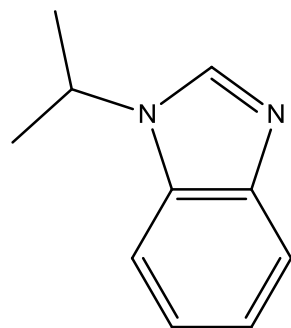

N-*i*-propyl benzimidazole (I)

1. FT-IR
2.  $^1\text{H}$ NMR
3.  $^{13}\text{C}$ NMR

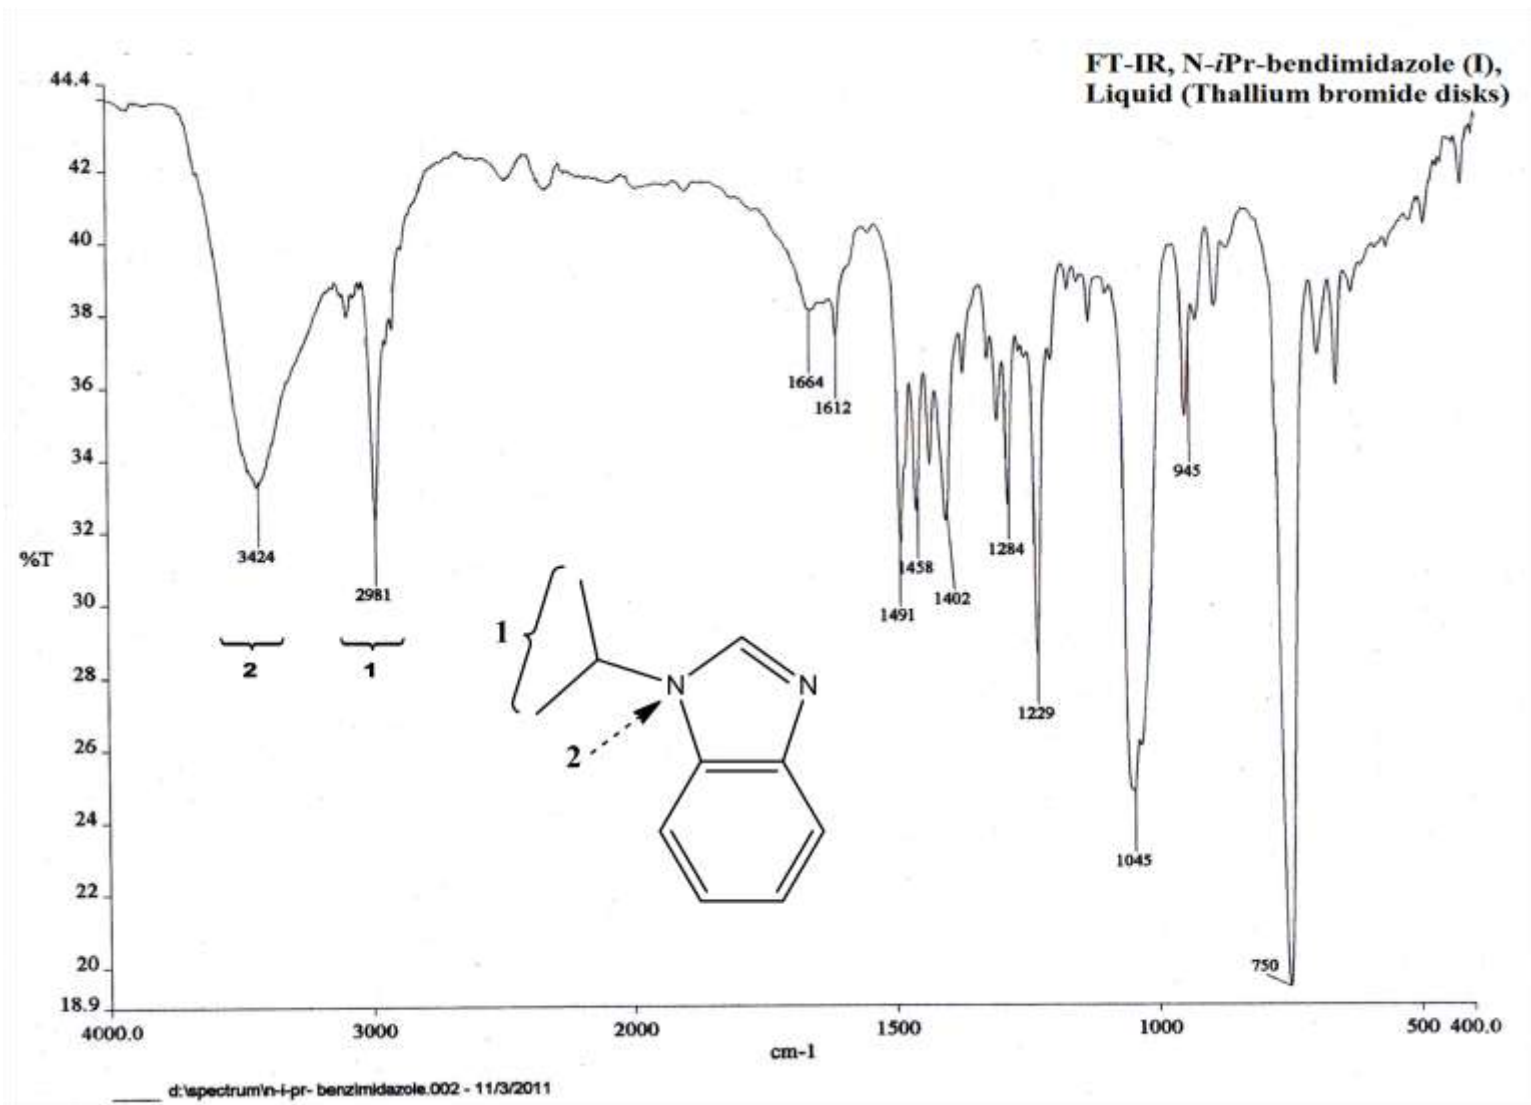

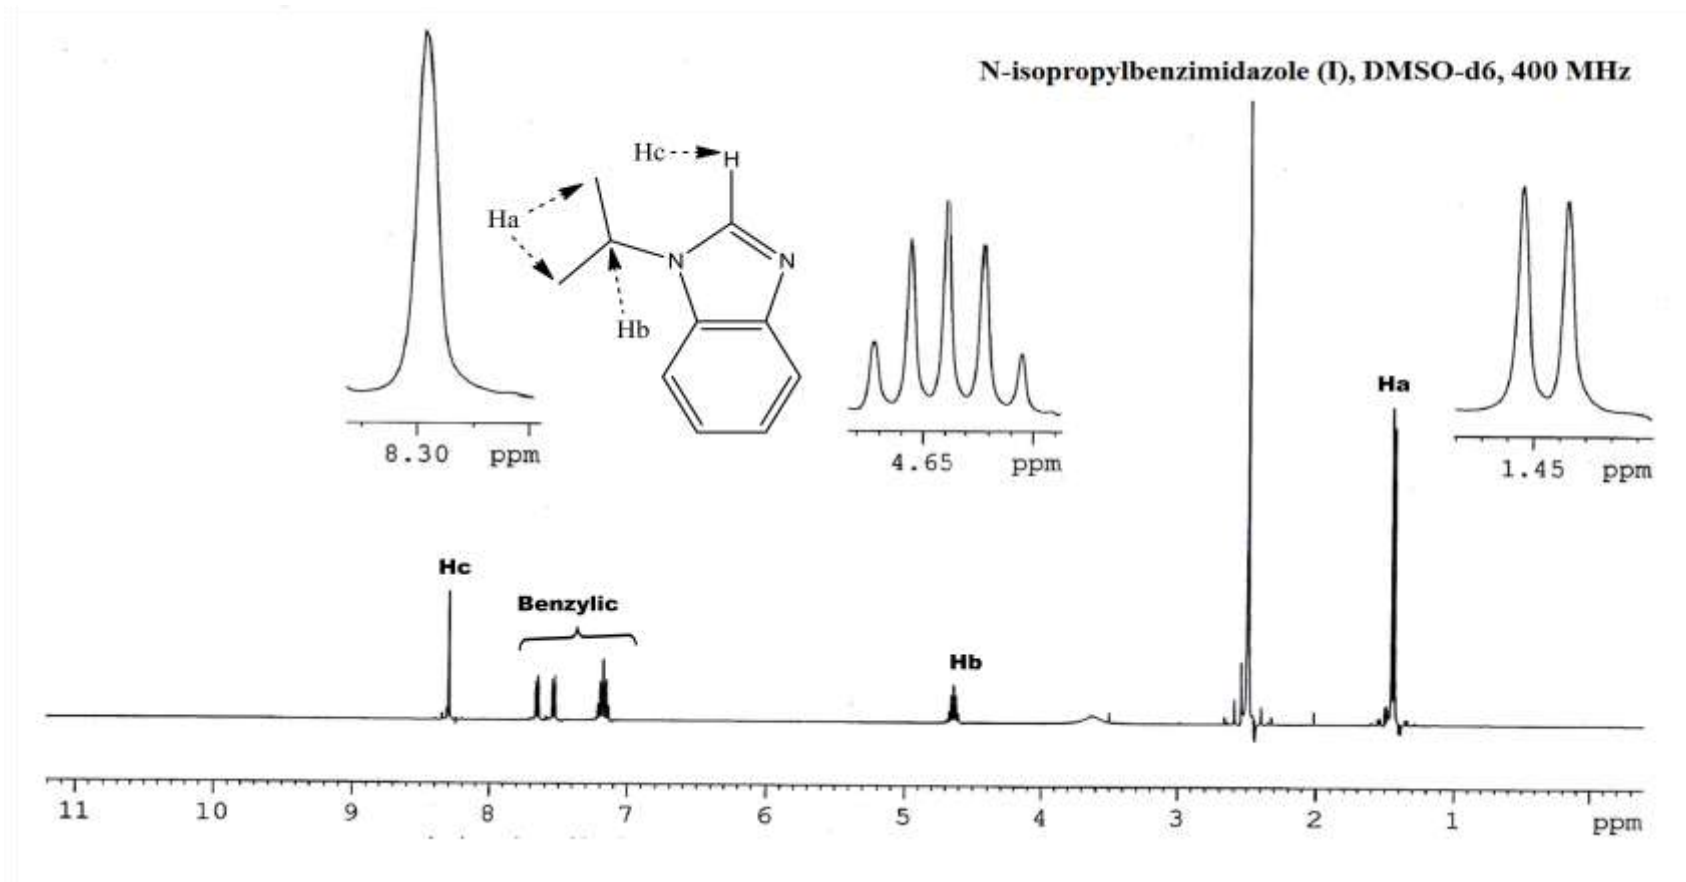

N-isopropylbenzimidazole, d6-DMSO, 400 MHz

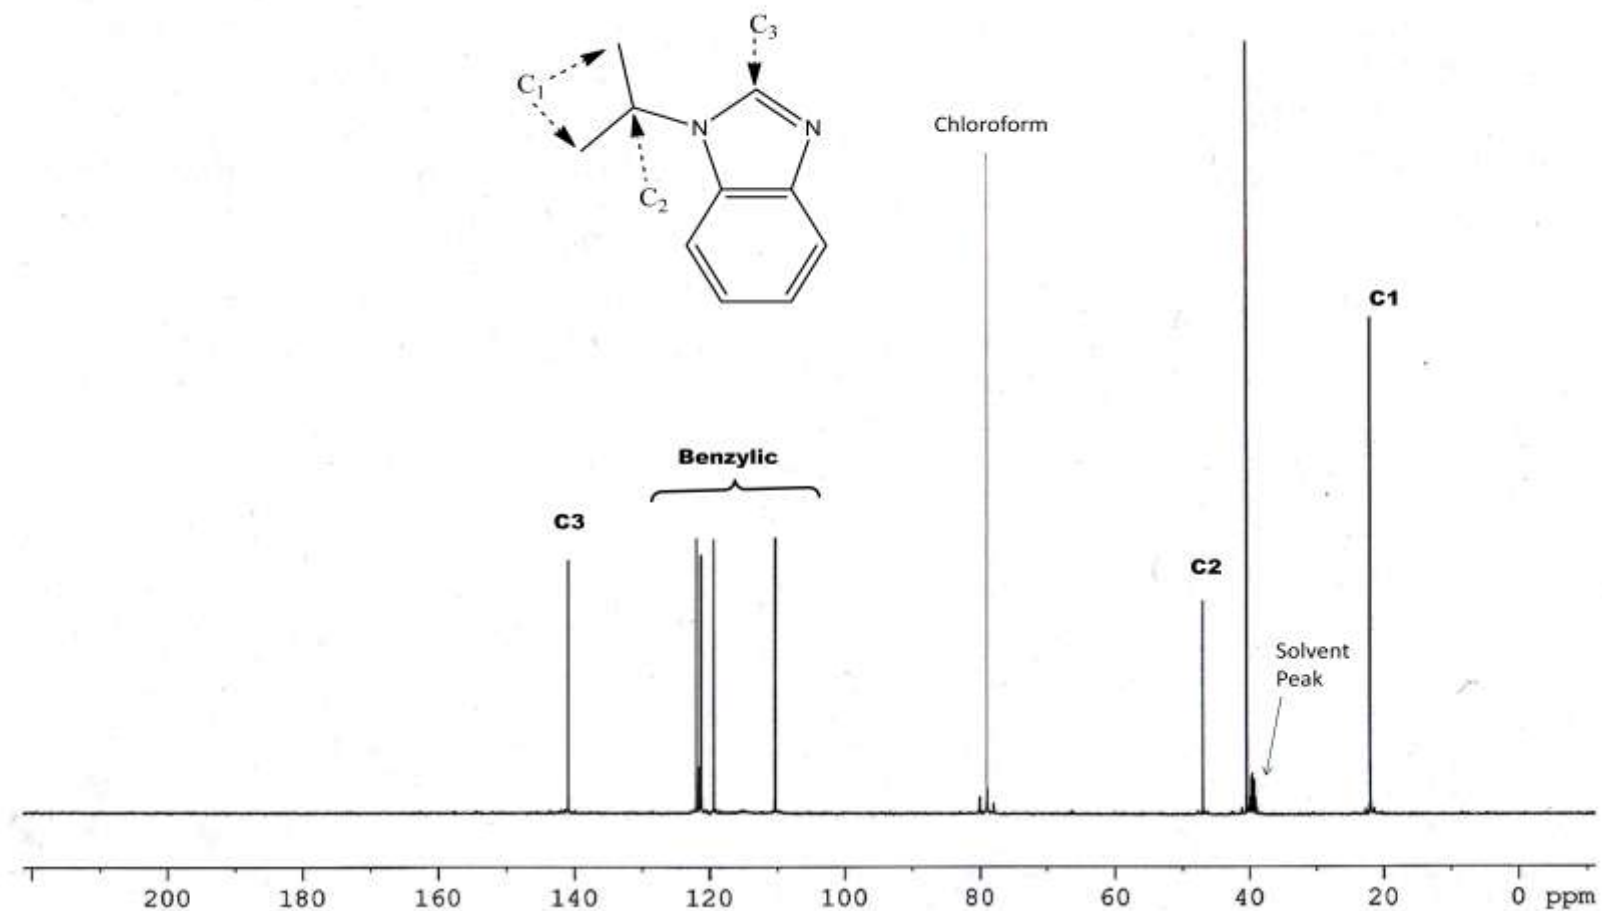

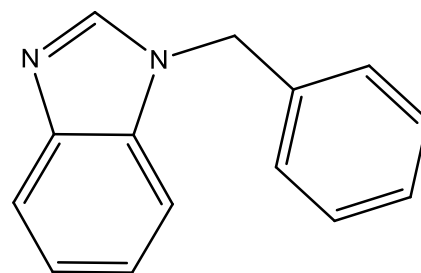

N-benzylbenzimidazole (**III**)

1. FT-IR
2.  $^1\text{H}$ NMR
3.  $^{13}\text{C}$ NMR

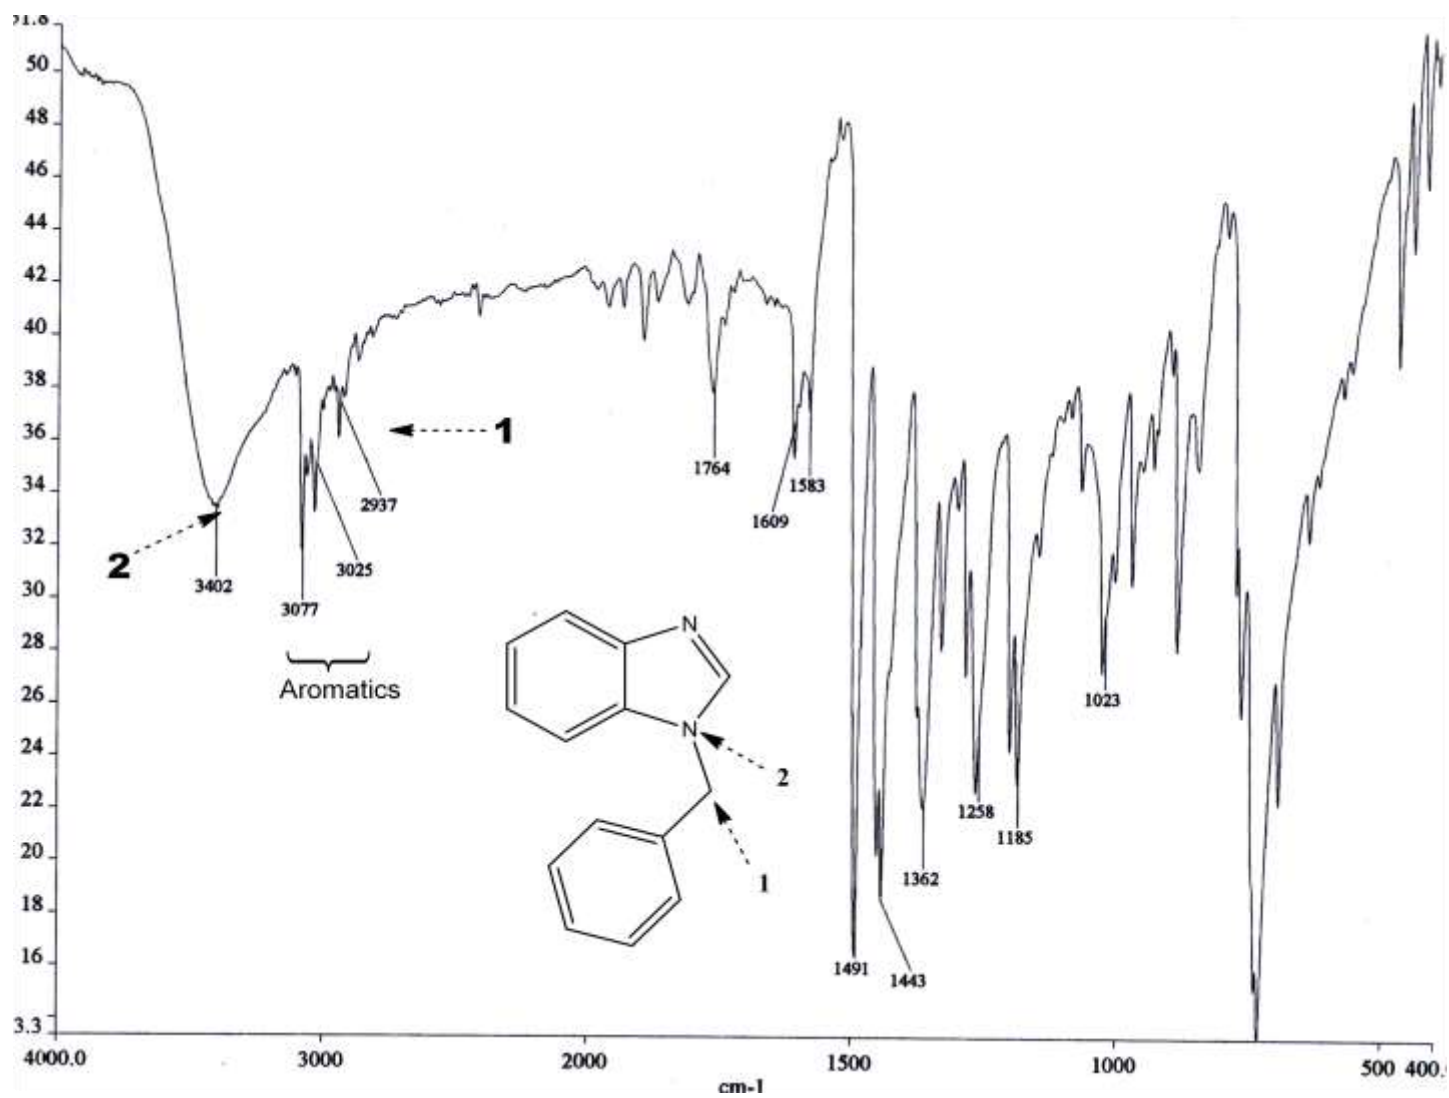

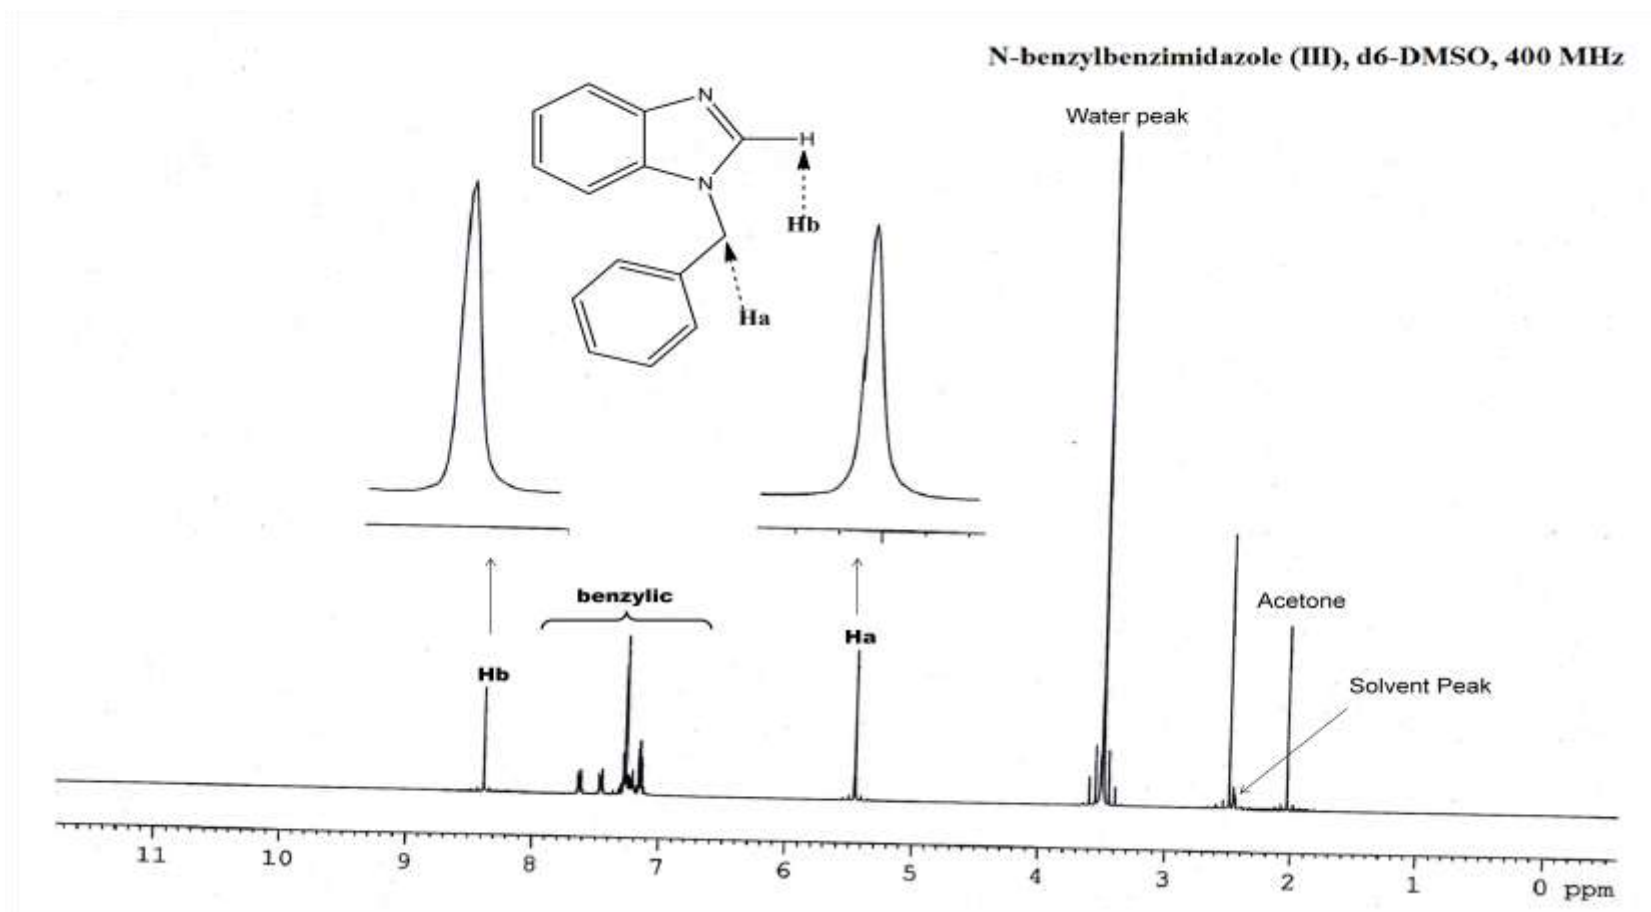

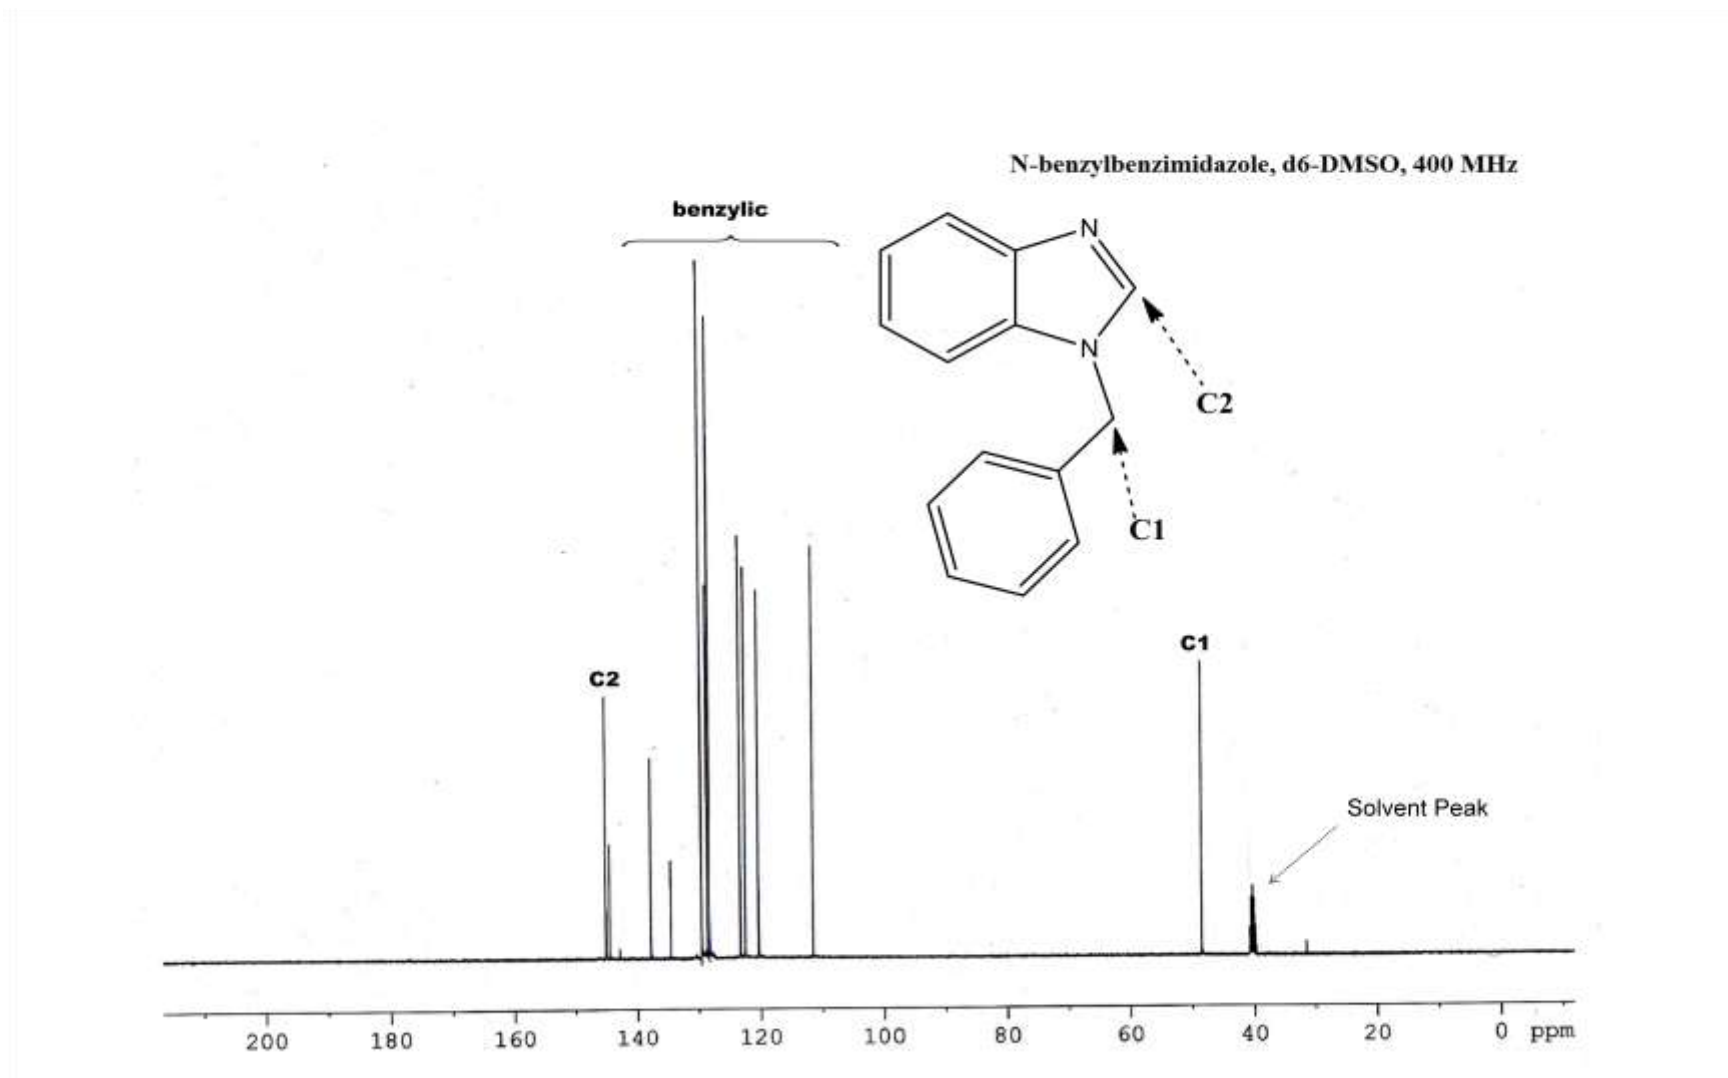



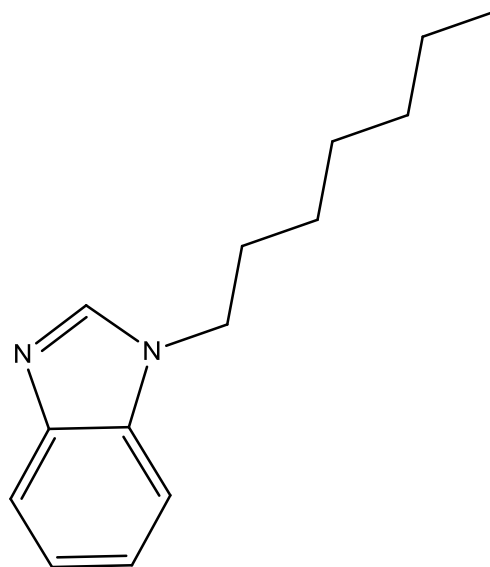

N-heptylbenzimidazole (V)

1. FT-IR
2.  $^1\text{H}$ NMR
3.  $^{13}\text{C}$ NMR

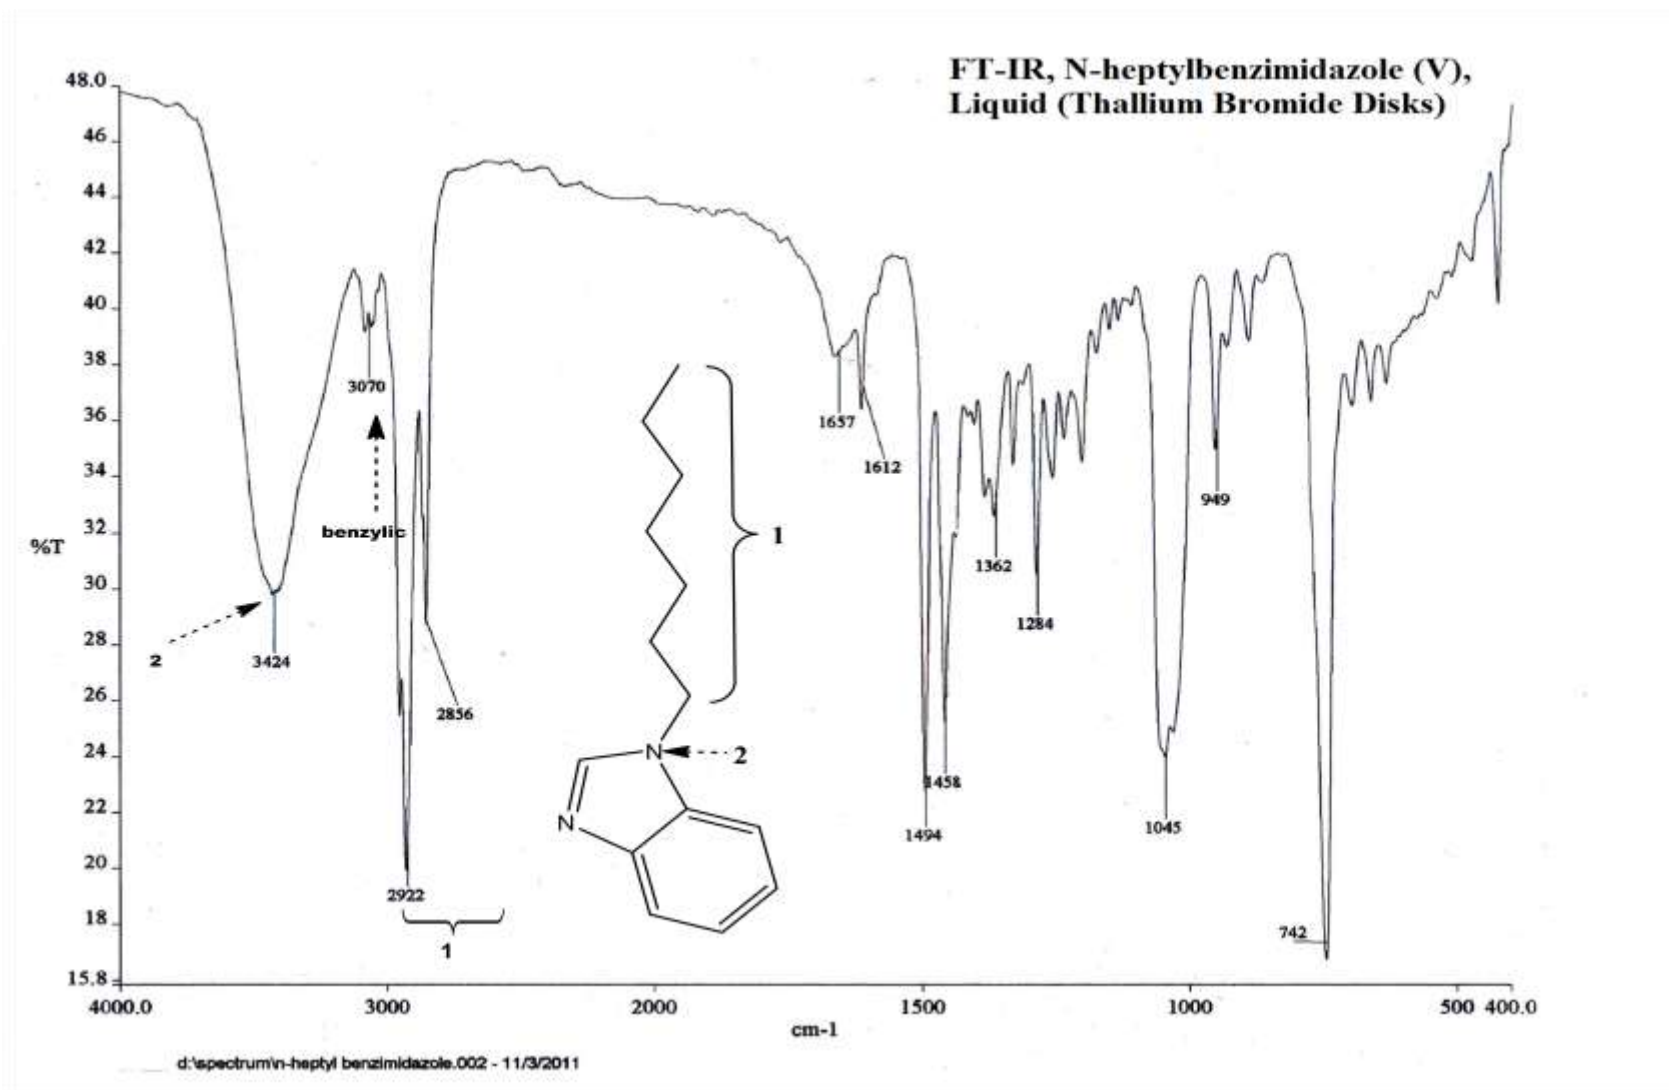

N-heptylbenzimidazole, d3-Acetonitril, 400 MHz

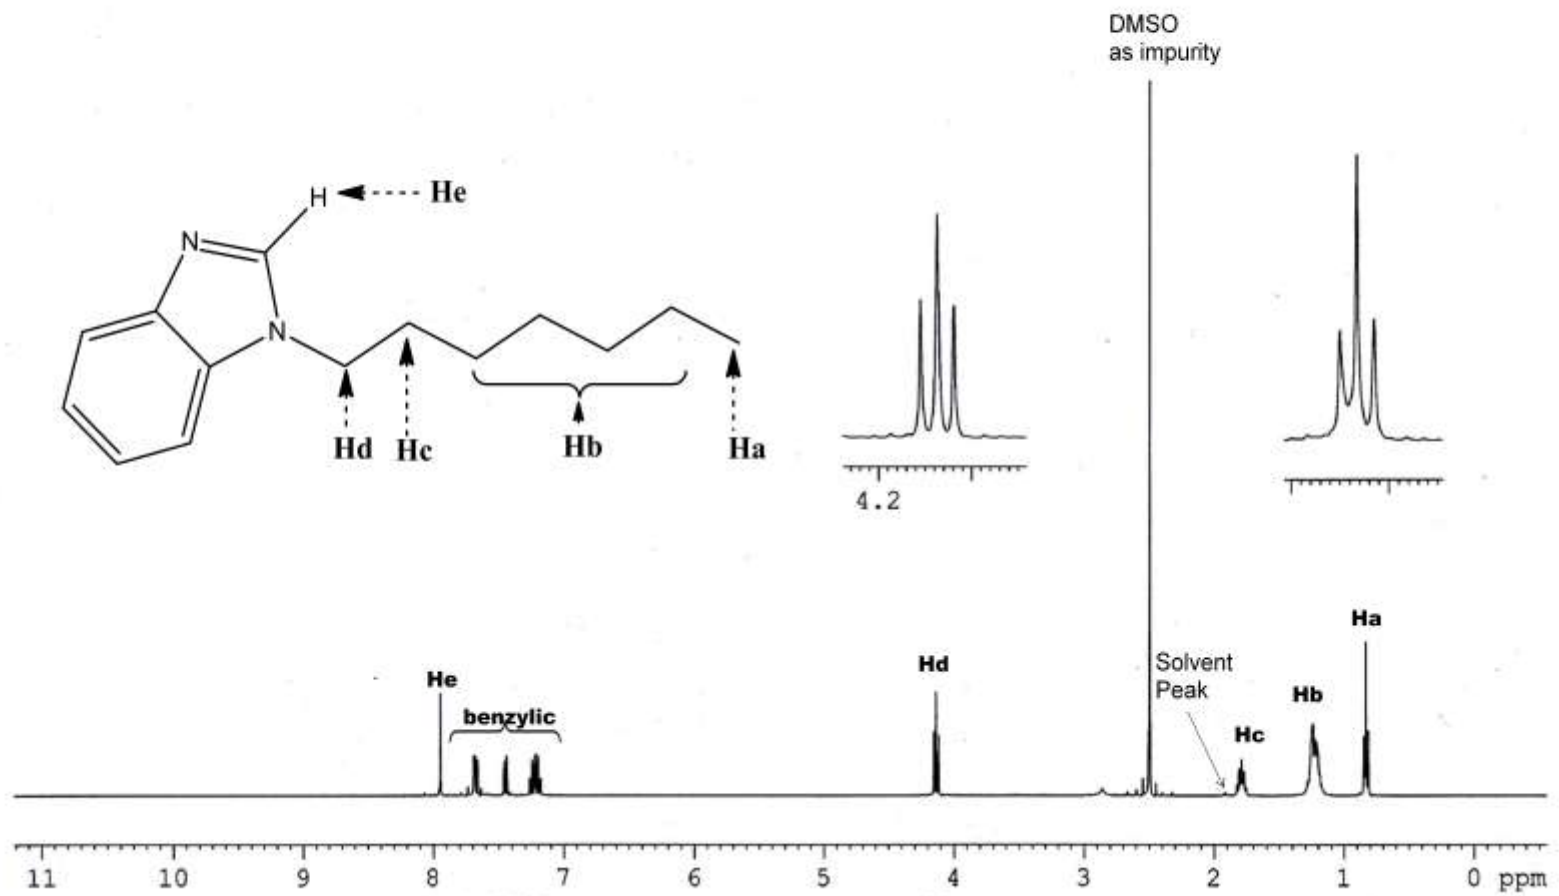

N-heptylbenzimidazole (V), d3-Acetonitril, 400 MHz

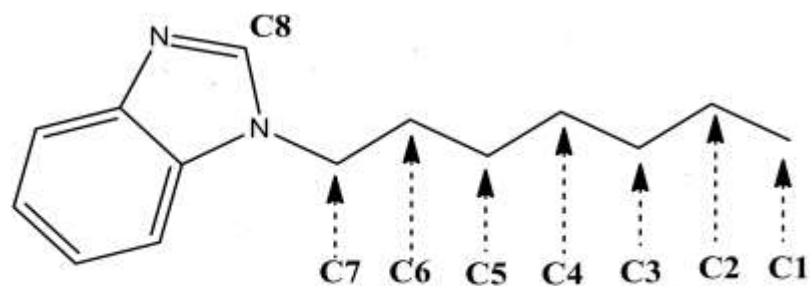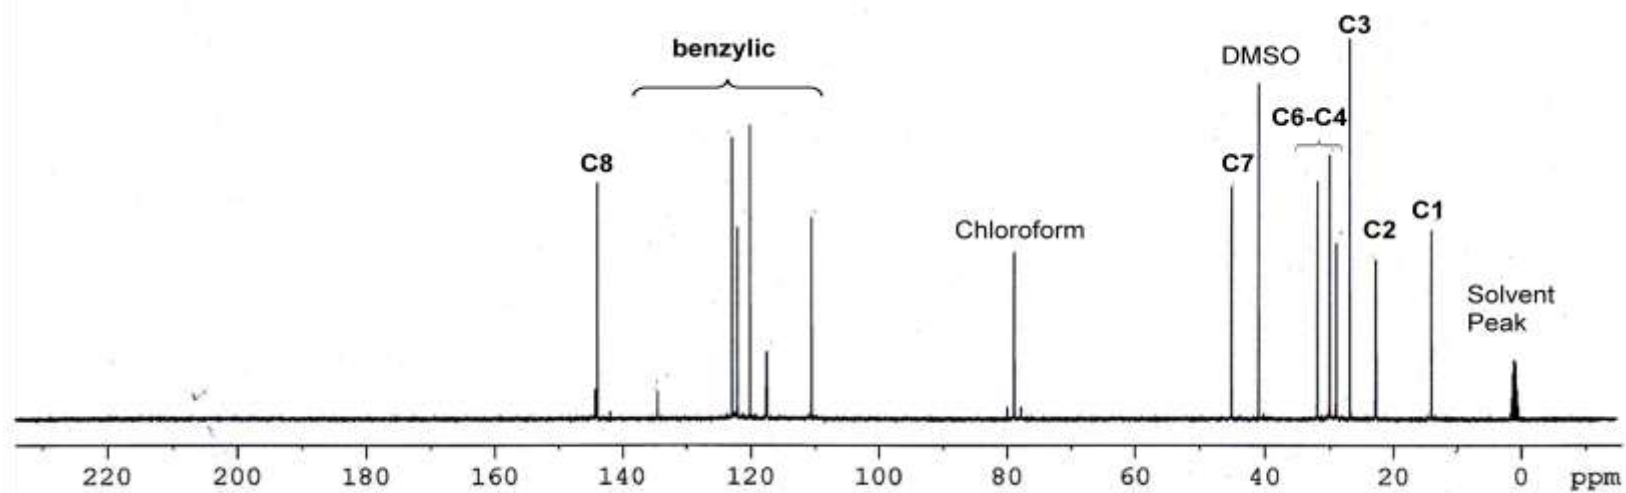

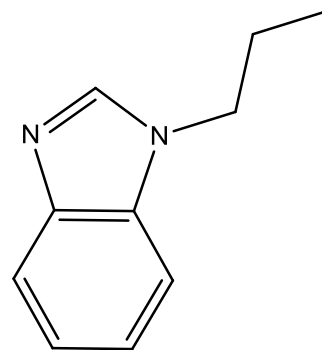

N-propylbenzimidazole (**VI**)

1. FT-IR benzimidazole
2. FT-IR
3.  $^1\text{H}$ NMR of propyl bromide
4.  $^1\text{H}$ NMR
5.  $^{13}\text{C}$ NMR

FT-IR, Benzimidazole  
Solid (KBr)

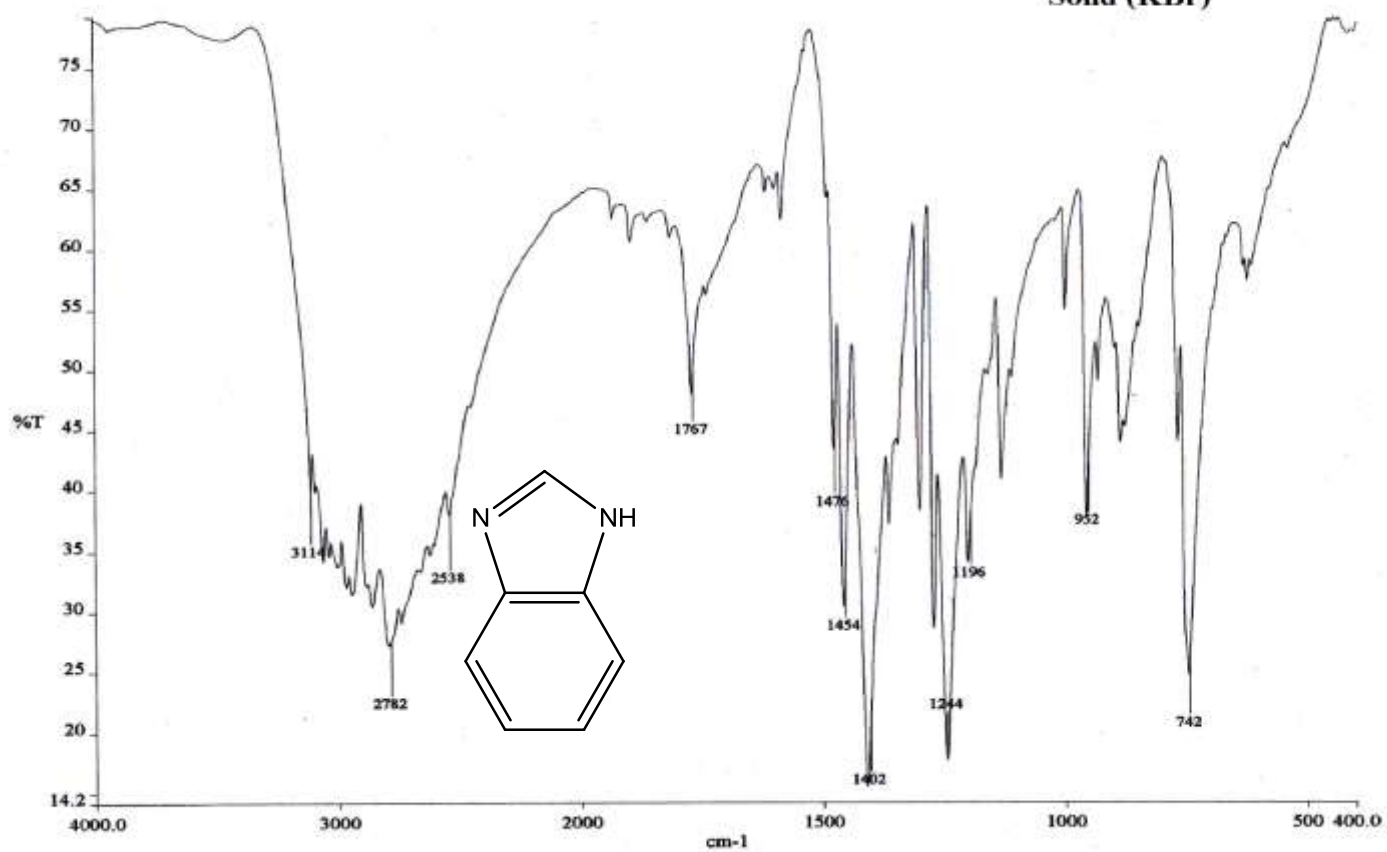

d:\spectrum\benzimidazole.008 - 11/3/2011

FT-IR, N-propylbenzimidazole (VI),  
Liquid (Thallium Bromide Disks)

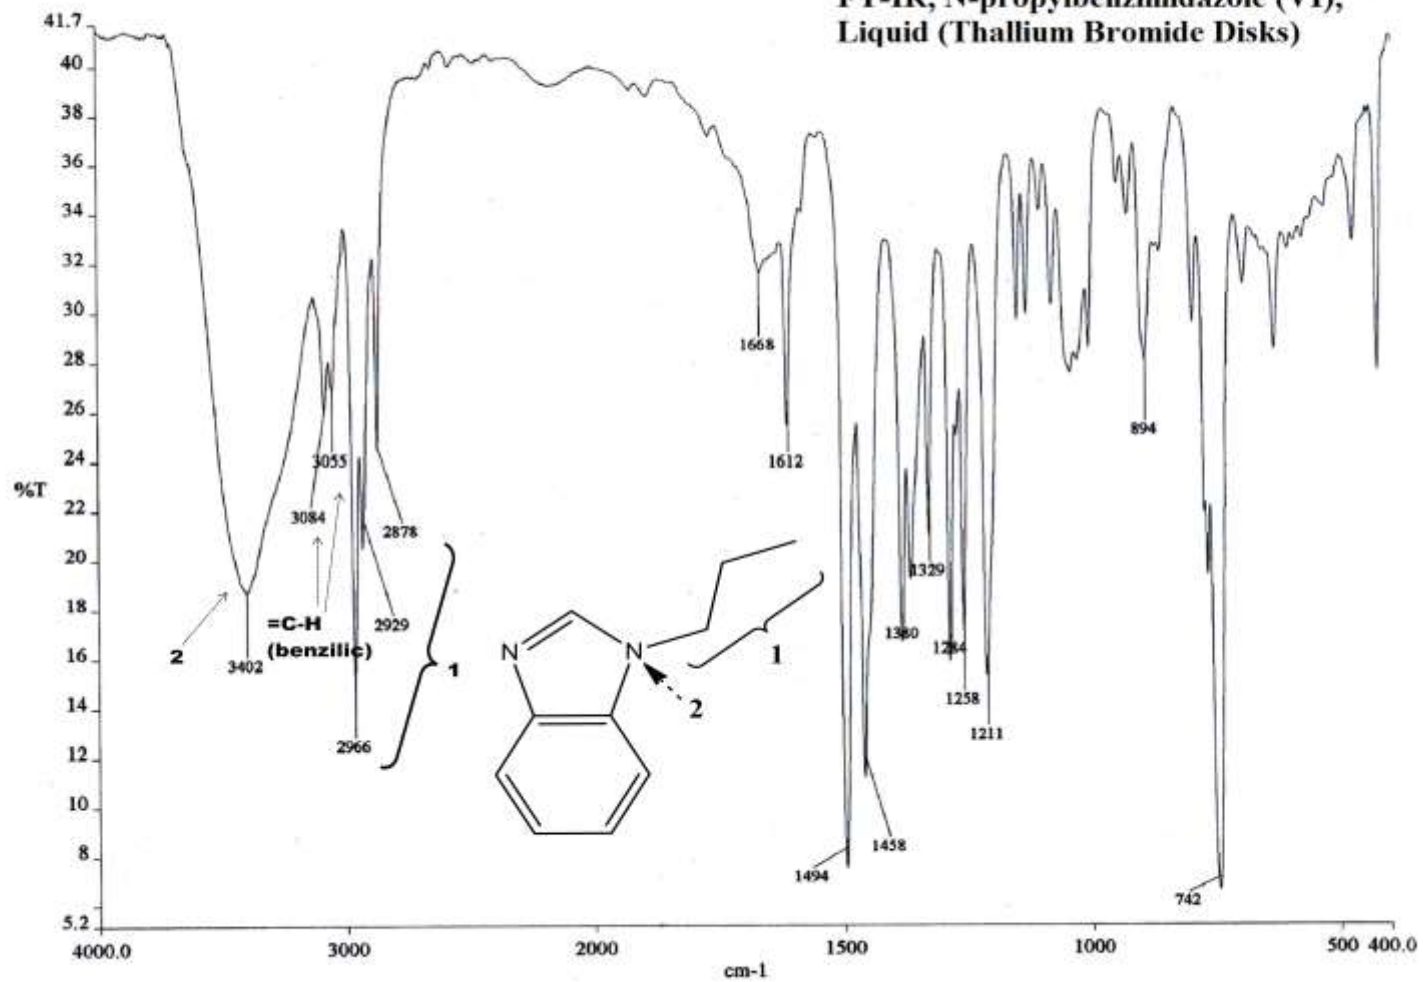

d:\spectrum\n-propyl benzimidazole.002 - 11/3/2011

Propyl Bromide, d3-Acetonitrile, 300 MHz

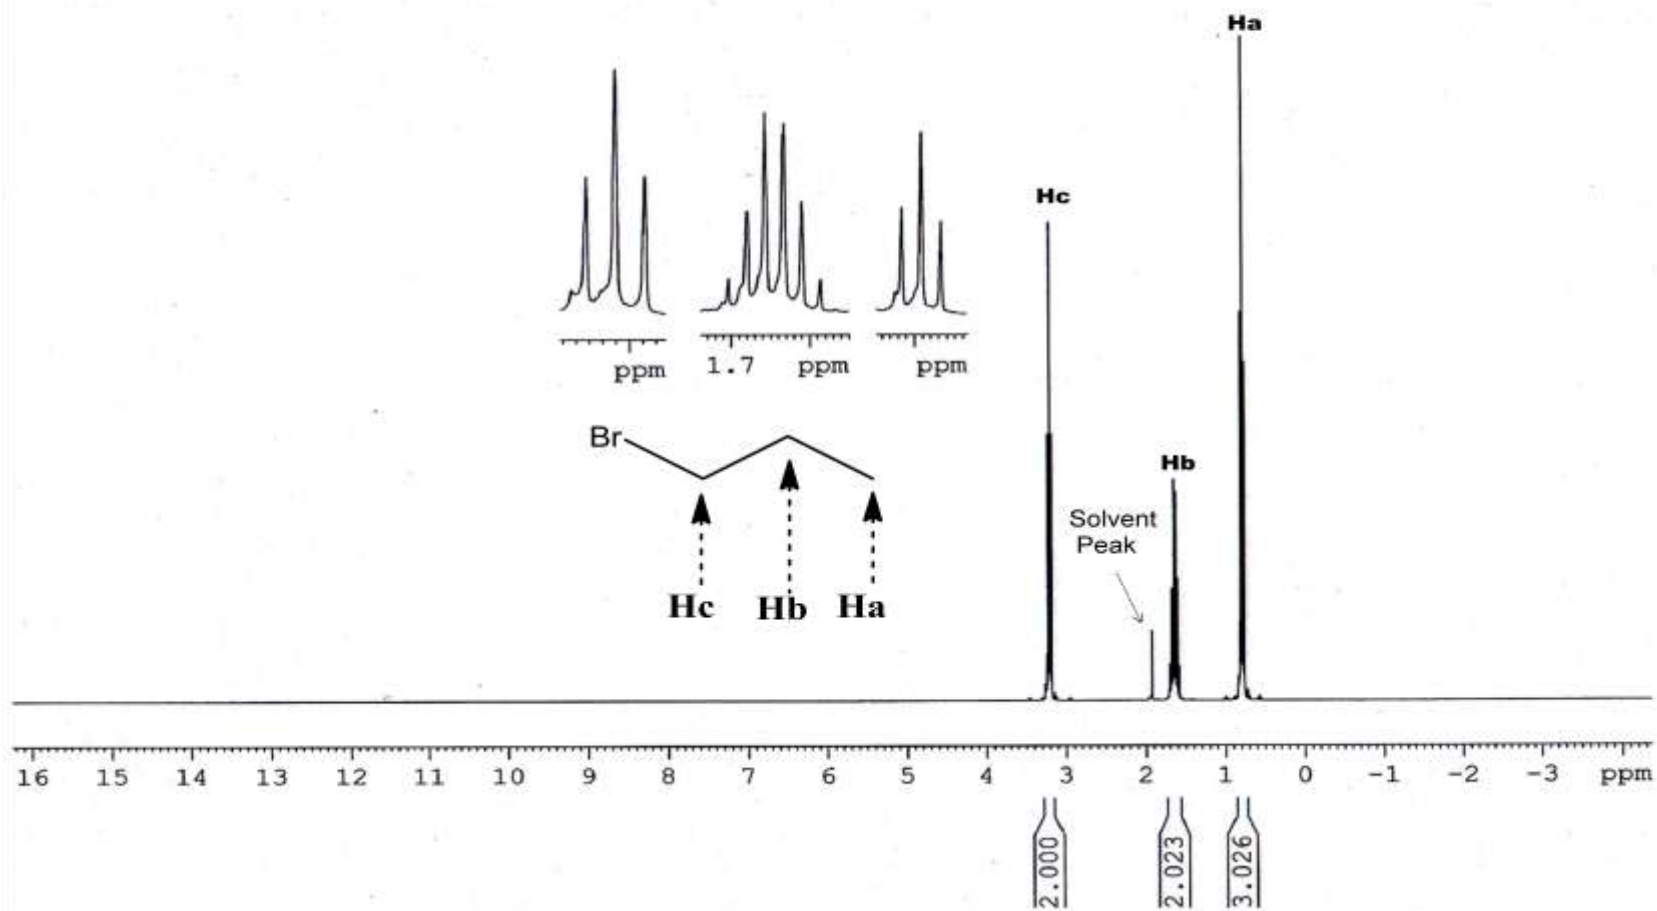



N-Propylbenzimidazole, d3-Acetonitrile, 300 MHz

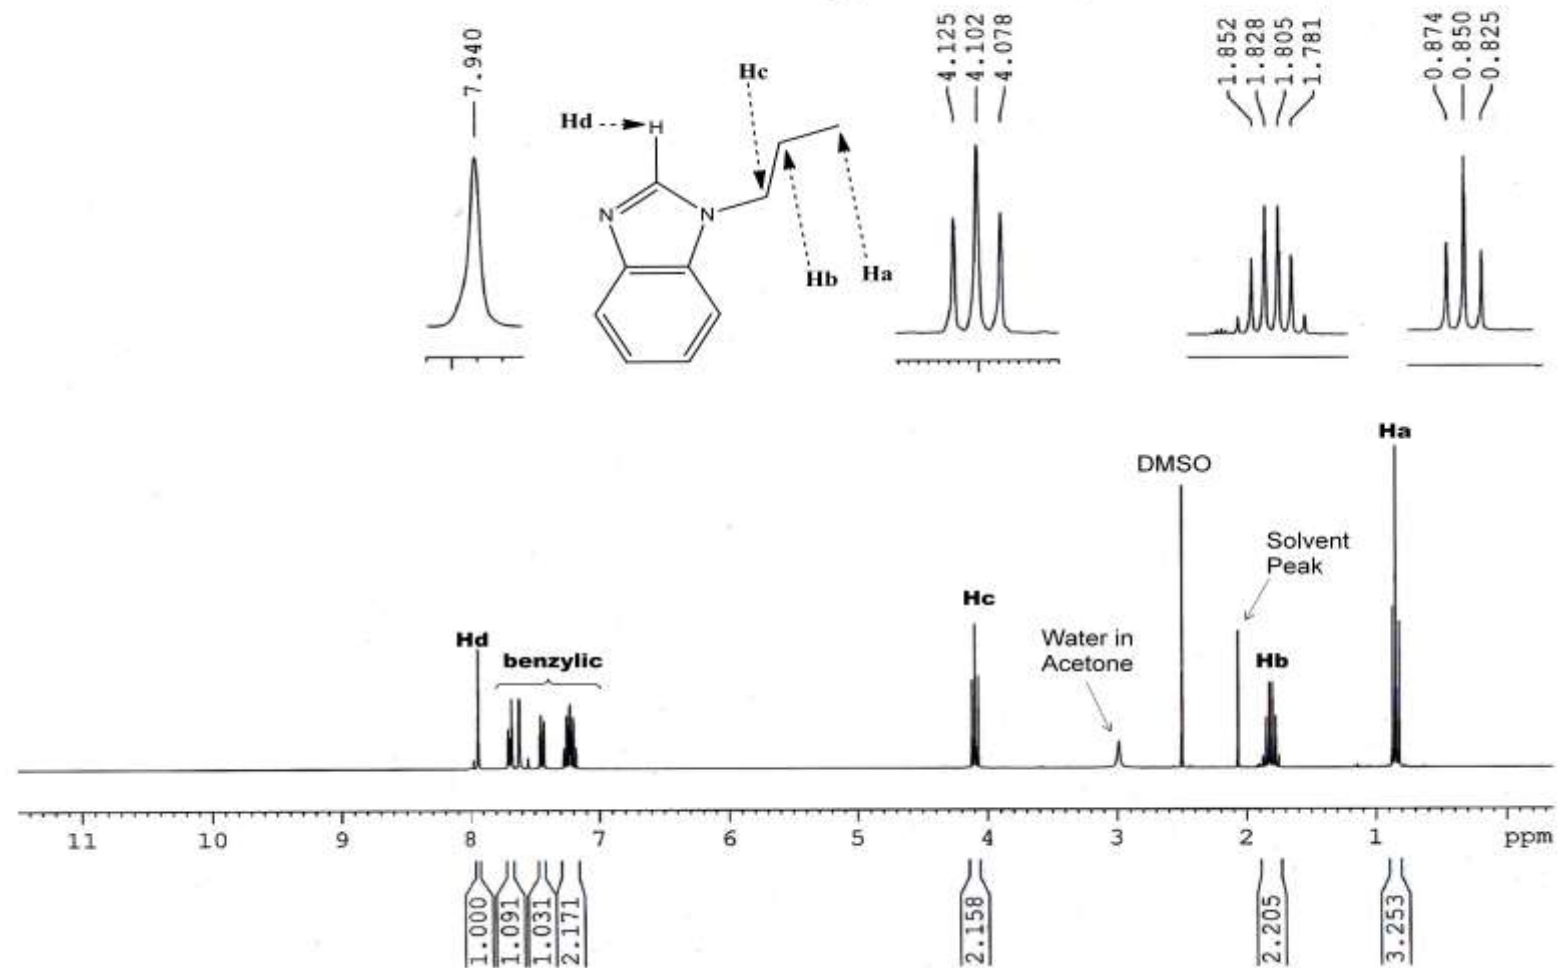

N-Propylbenzimidazole, d3-Acetonitrile, 300 MHz

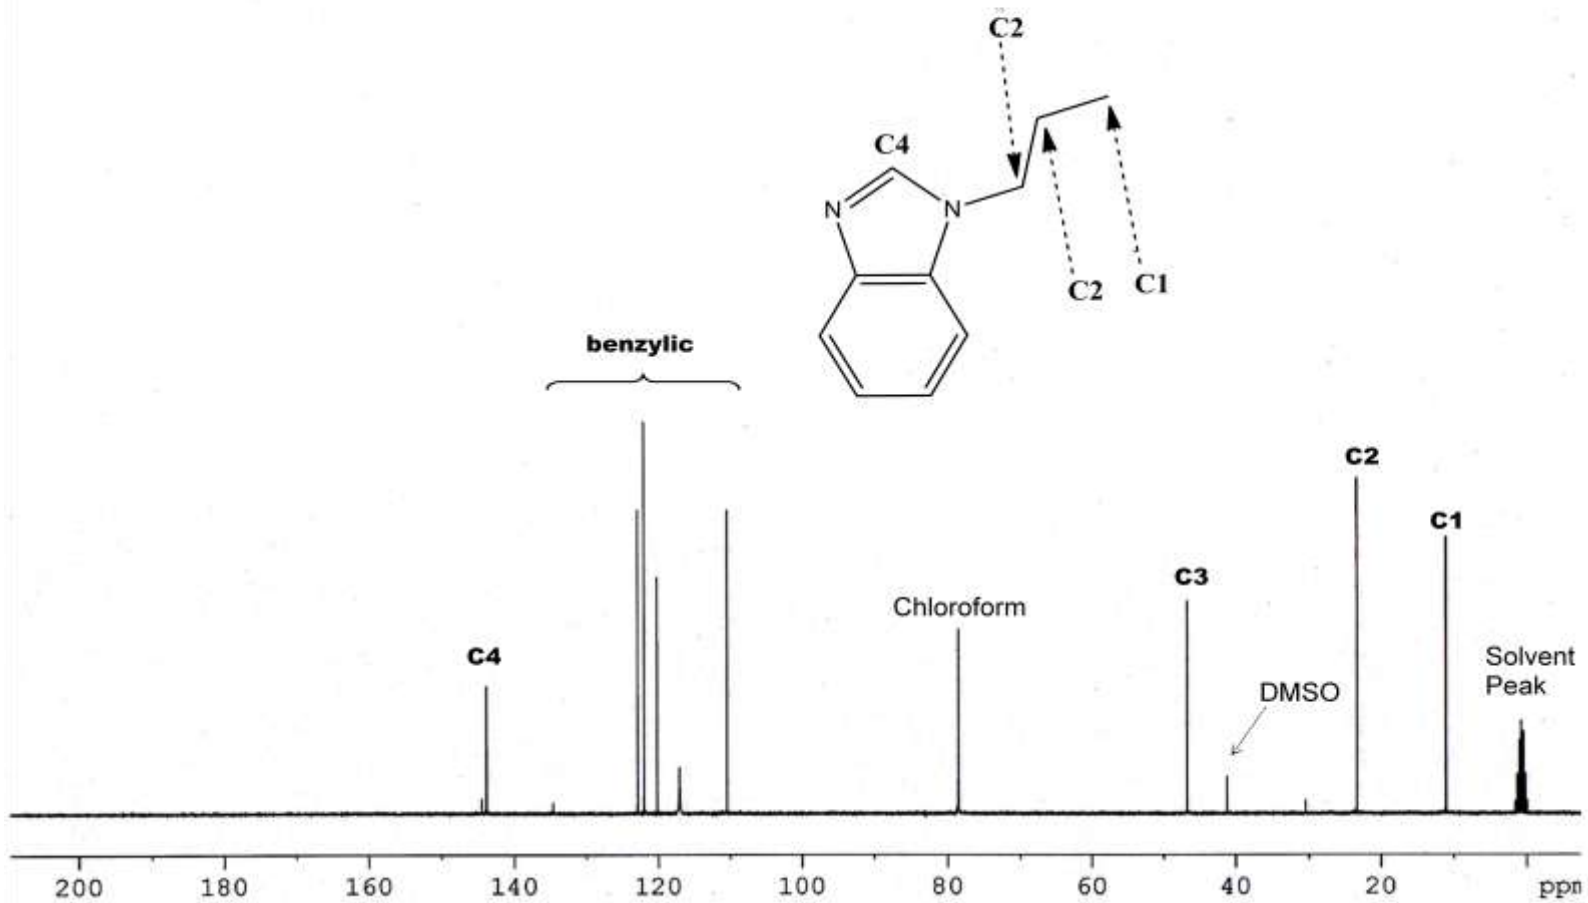

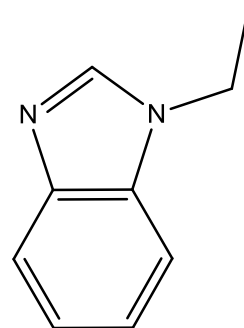

N-ethylbenzimidazole (VII)

1. FT-IR
2.  $^1\text{H}$ NMR
3.  $^{13}\text{C}$ NMR

FT-IR, N-Ethylbenzimidazole (VII)  
Liquid (Thallium Bromide Disks)

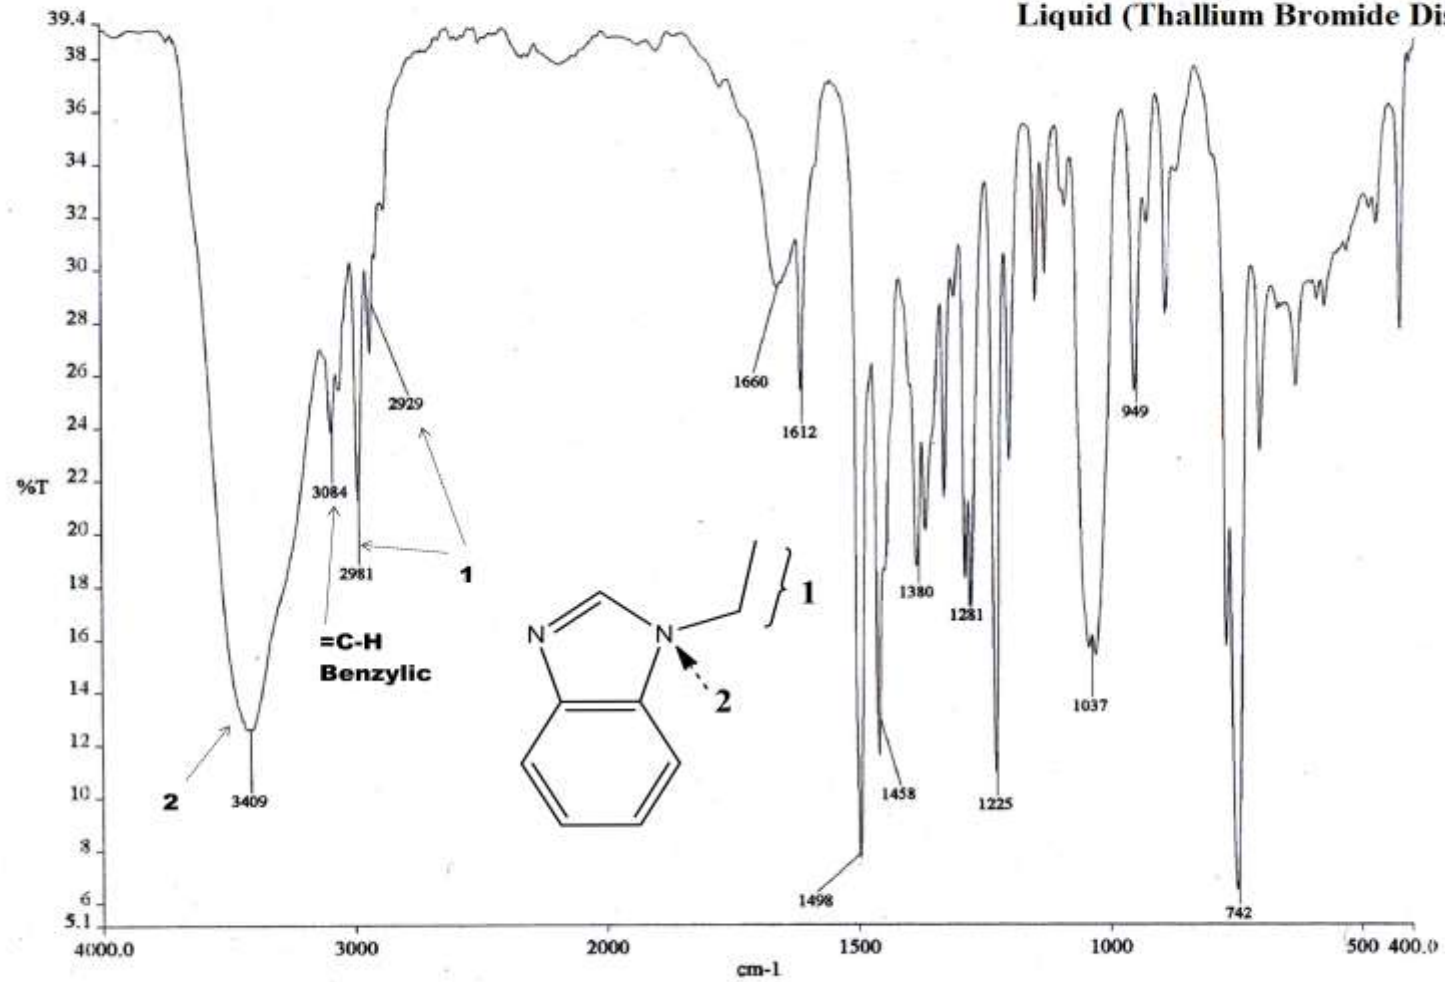

d:\spectrum\n-ethylbenzimidazole.002 - 15-3-2011

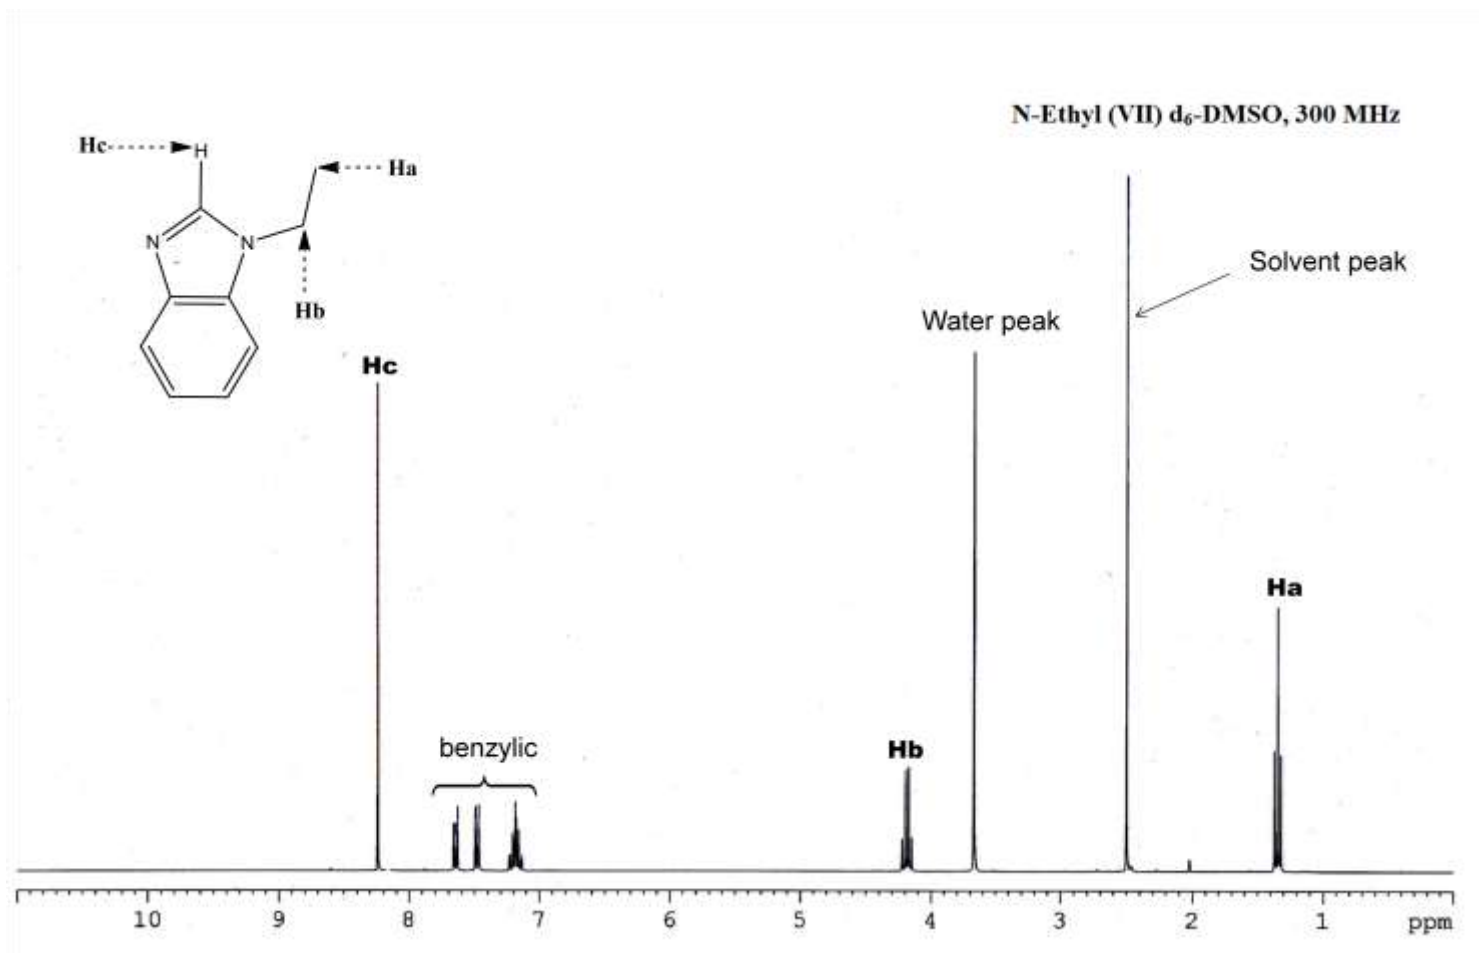

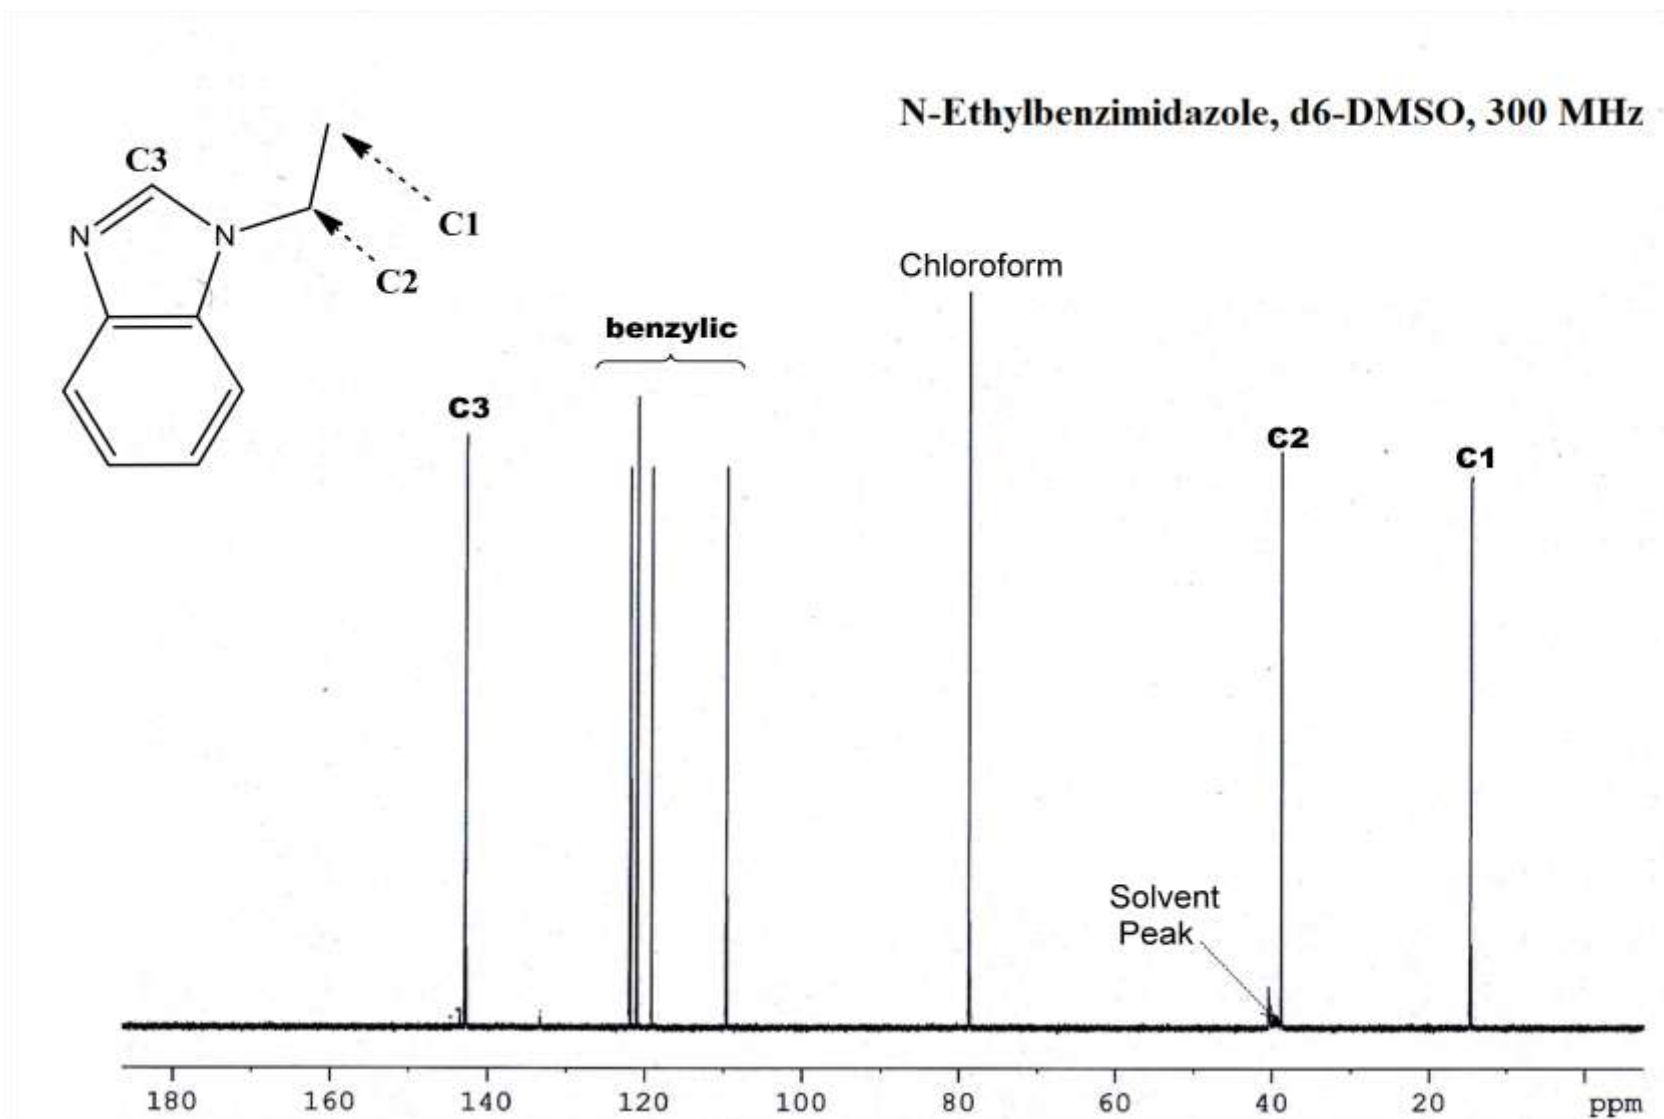

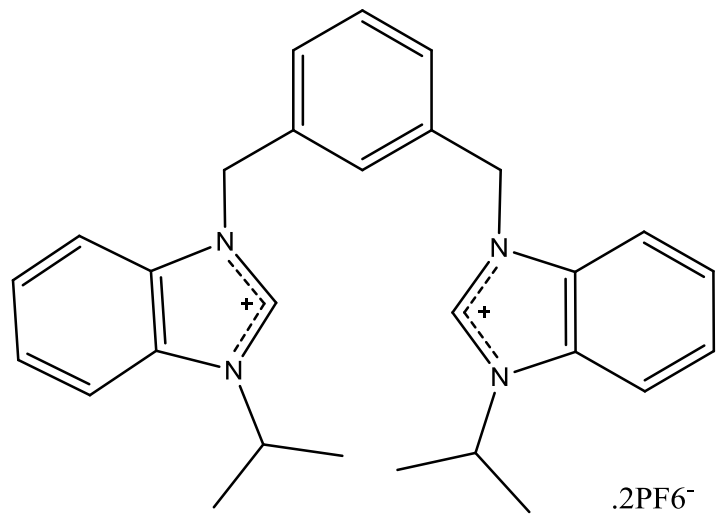

3,3'-(1,3-phenylenebis(methylene))bis(1-isopropyl-1H-benzimidazolium) salt (**VIII.2PF<sub>6</sub>**)

1. FT-IR
2. <sup>1</sup>HNMR
3. <sup>13</sup>CNMR

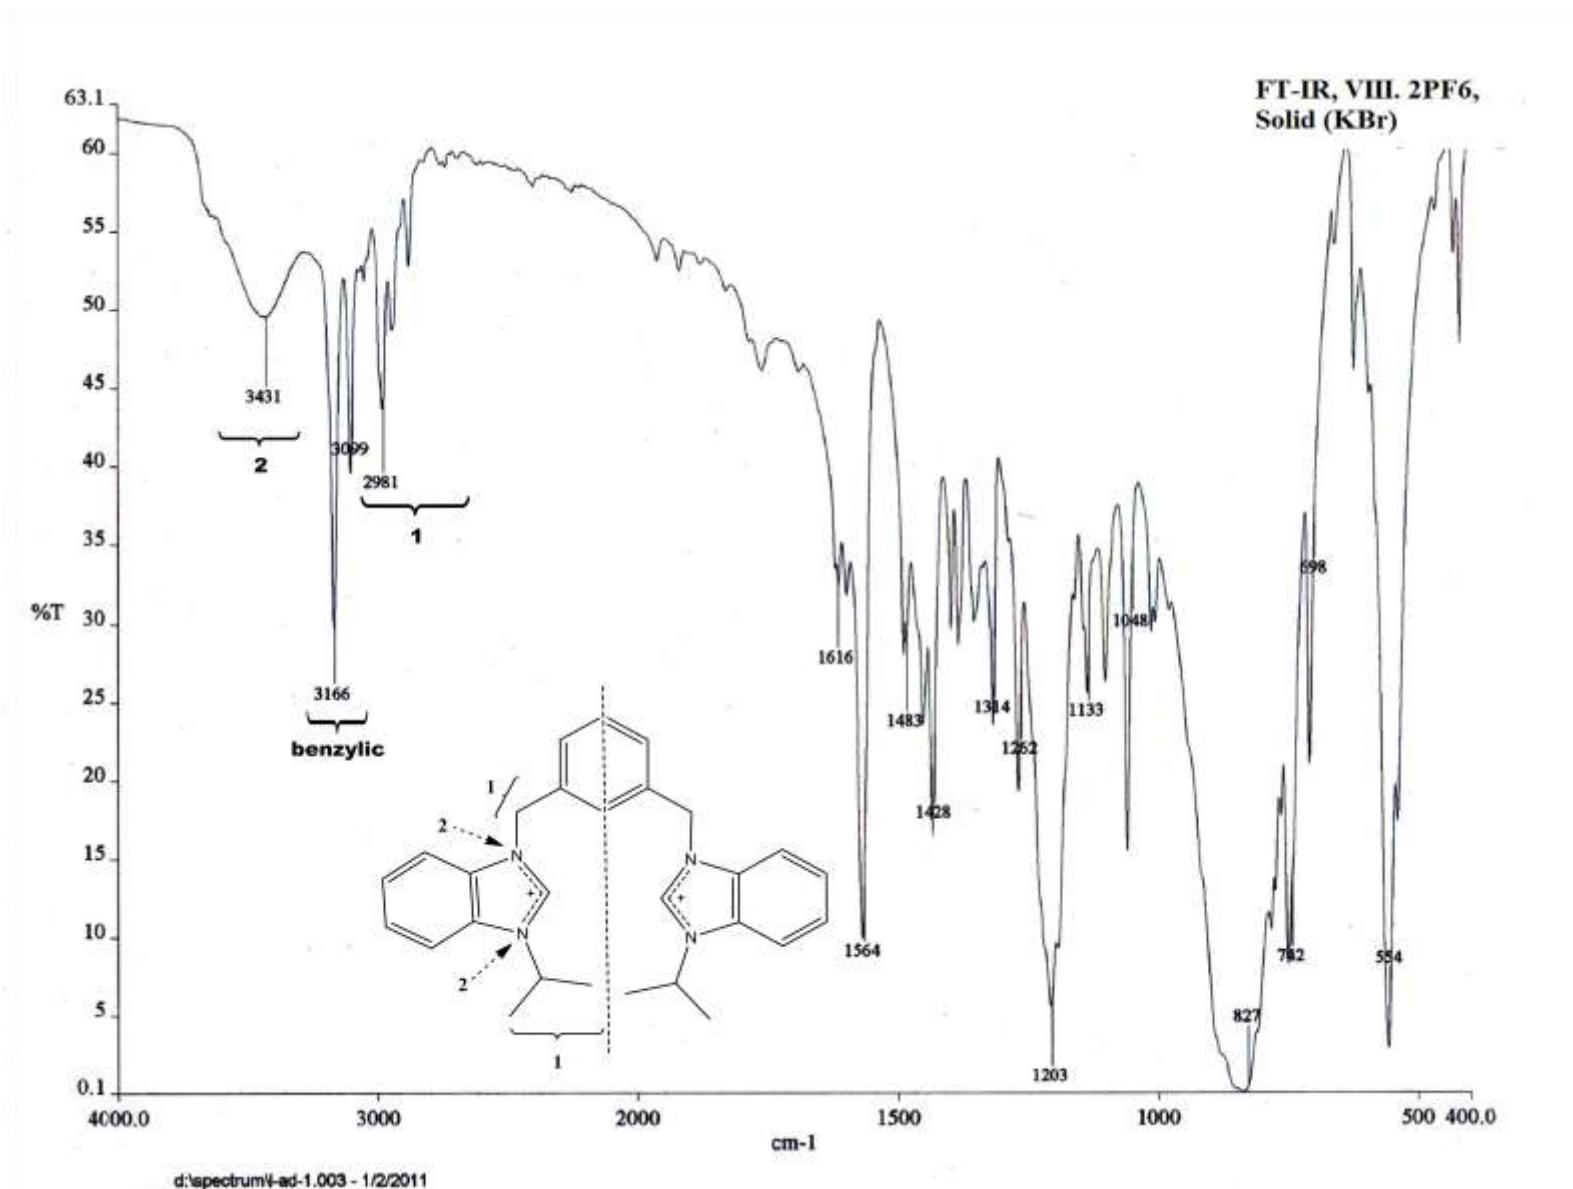



VIII. 2PF6, d6-DMSO, 400 Mhz

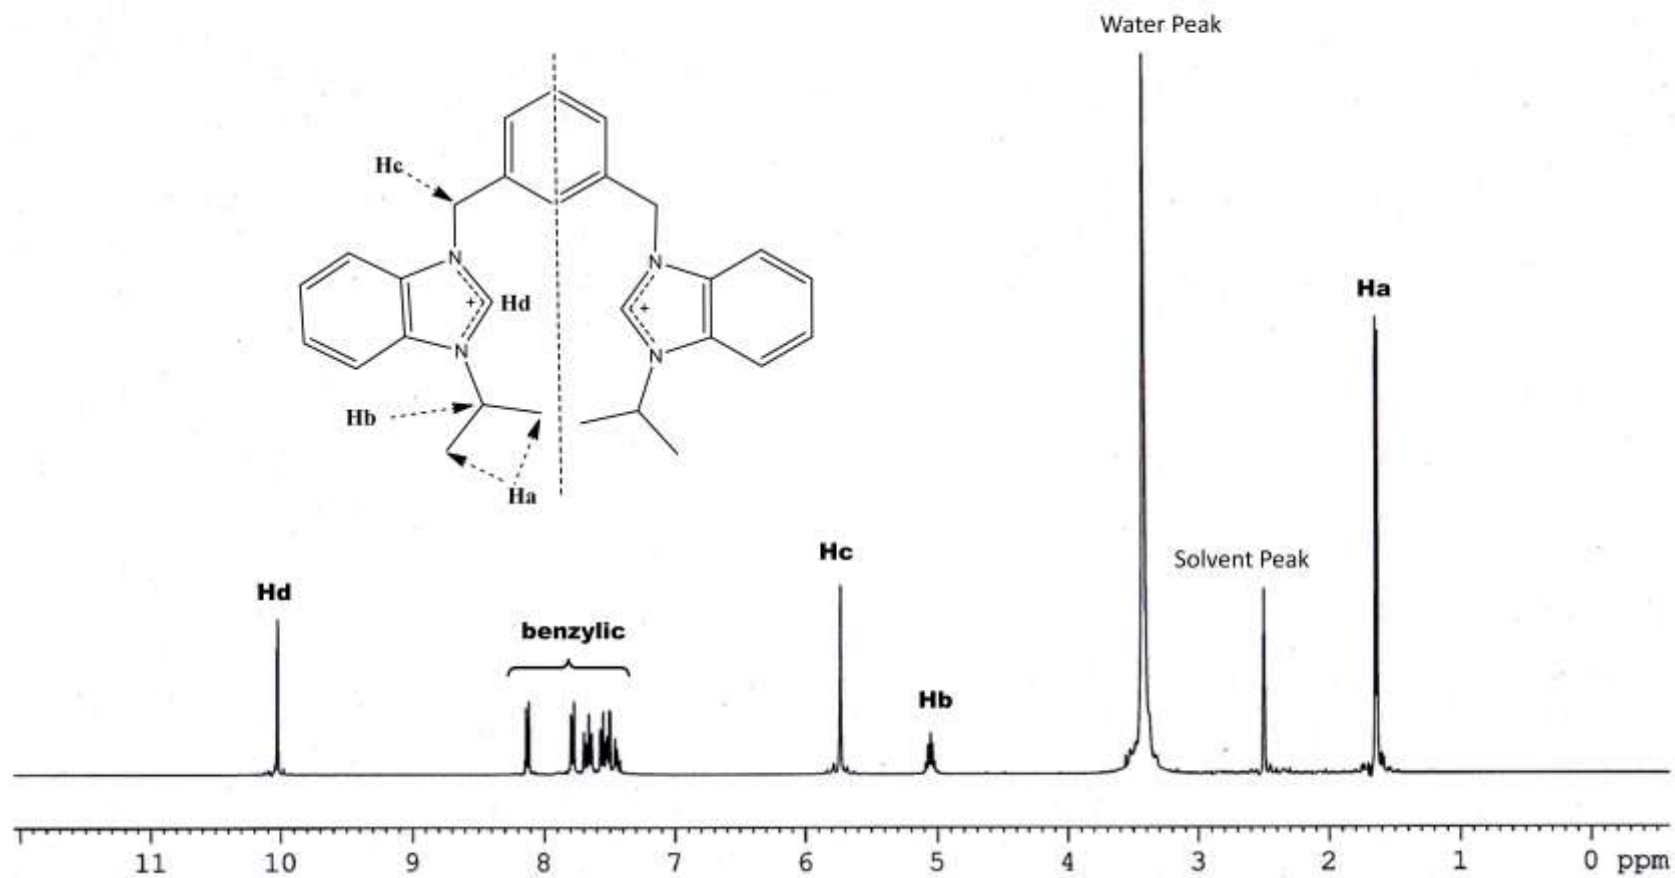



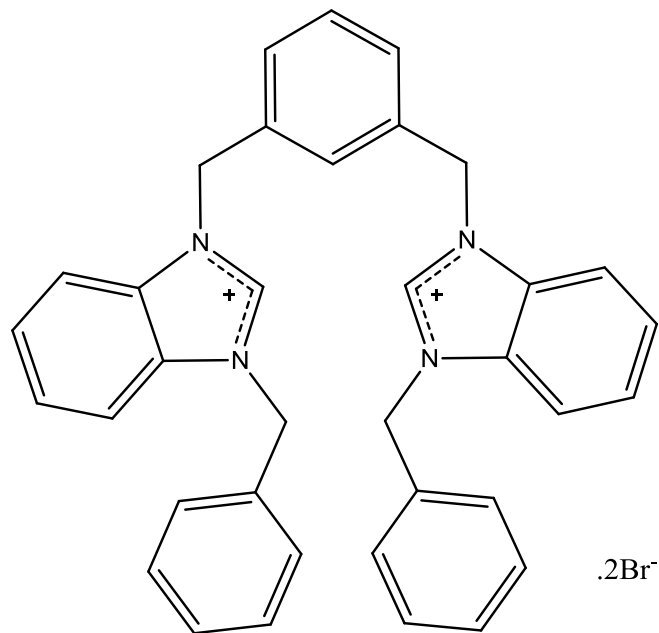

3,3'-(1,3-phenylenebis(methylene))bis(1-benzyl-1H-benzimidazolium) salt (**X.2Br**)

1. FT-IR
2.  $^1\text{H}$ NMR
3.  $^{13}\text{C}$ NMR

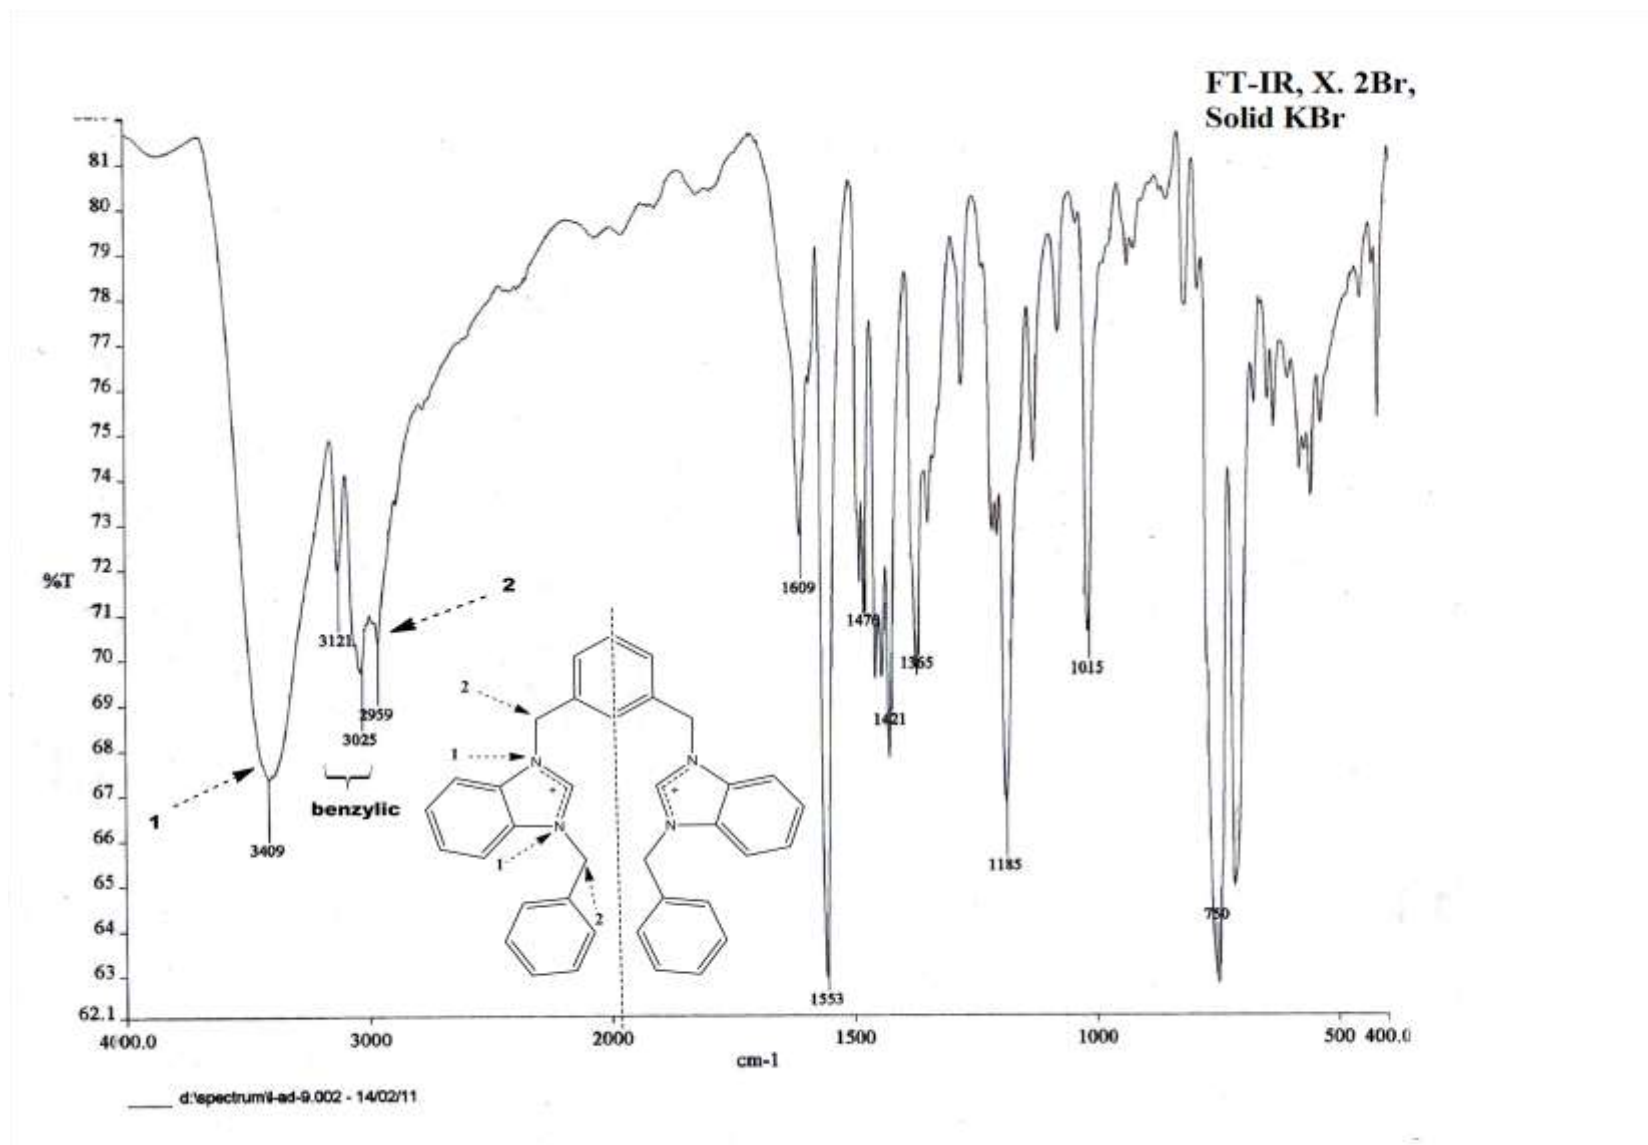

X. 2Br, d6-DMSO, 400 MHz

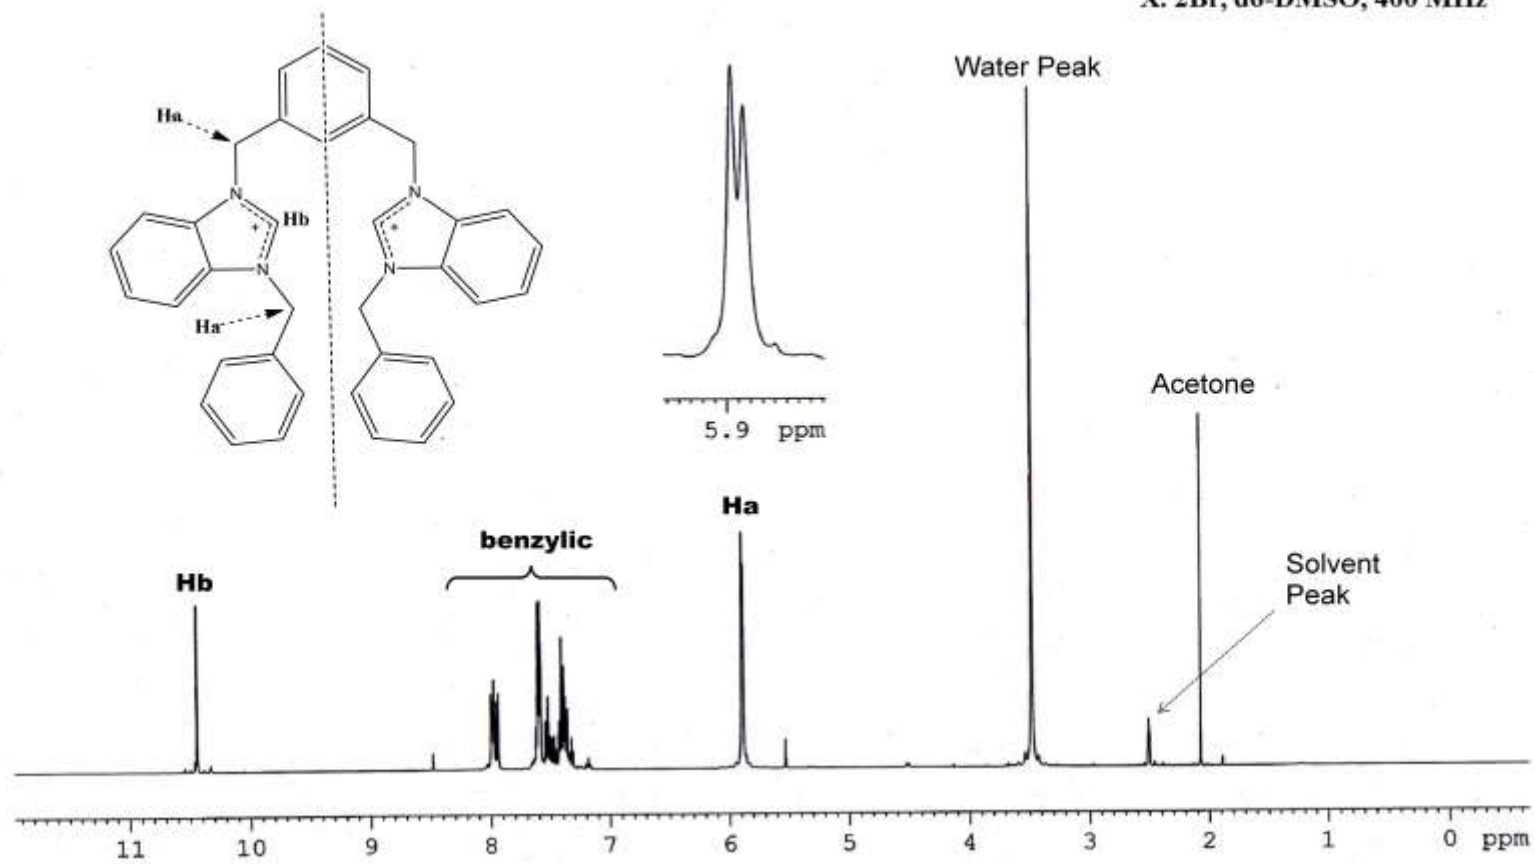



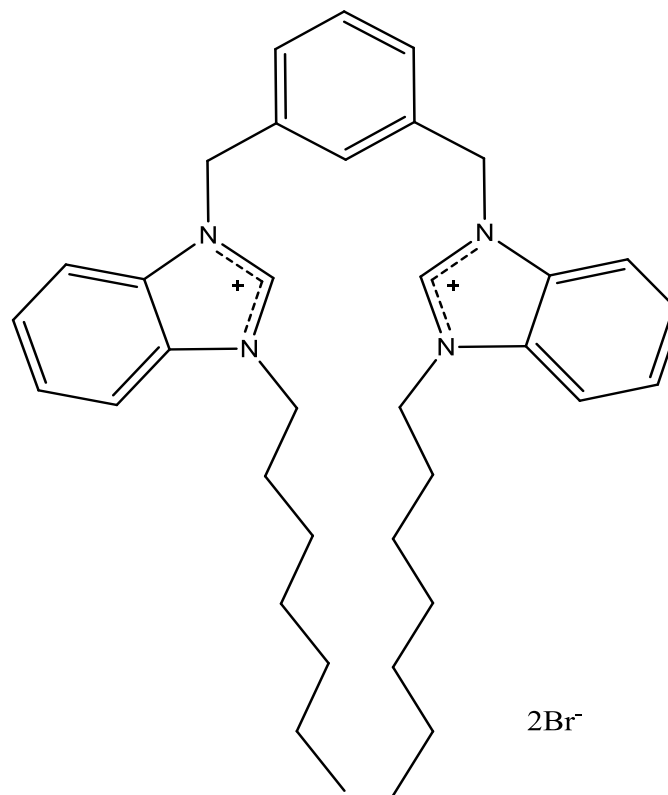

3,3'-(1,3-phenylenebis(methylene))bis(1-heptyl-1H-benzimidazolium) salt (**XII.2Br**)

1. FT-IR
2.  $^1\text{H}$ NMR
3.  $^{13}\text{C}$ NMR

FT-IR, XII. 2Br  
Solid (KBr)

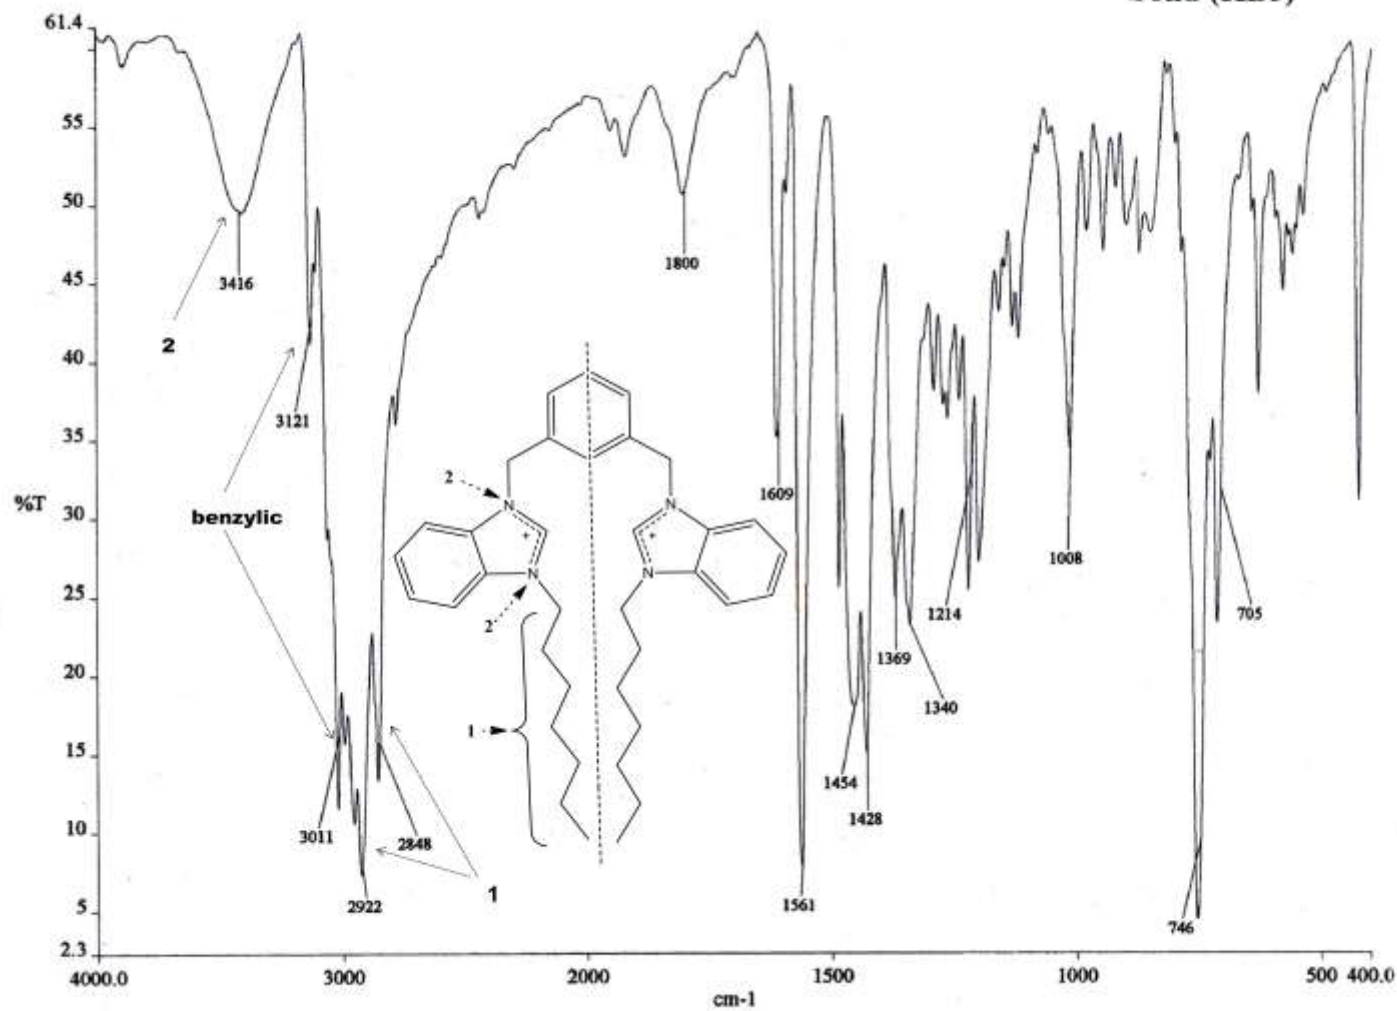

d:\spectrum\ad-14 (solid from reaction).002 - 02/03/11



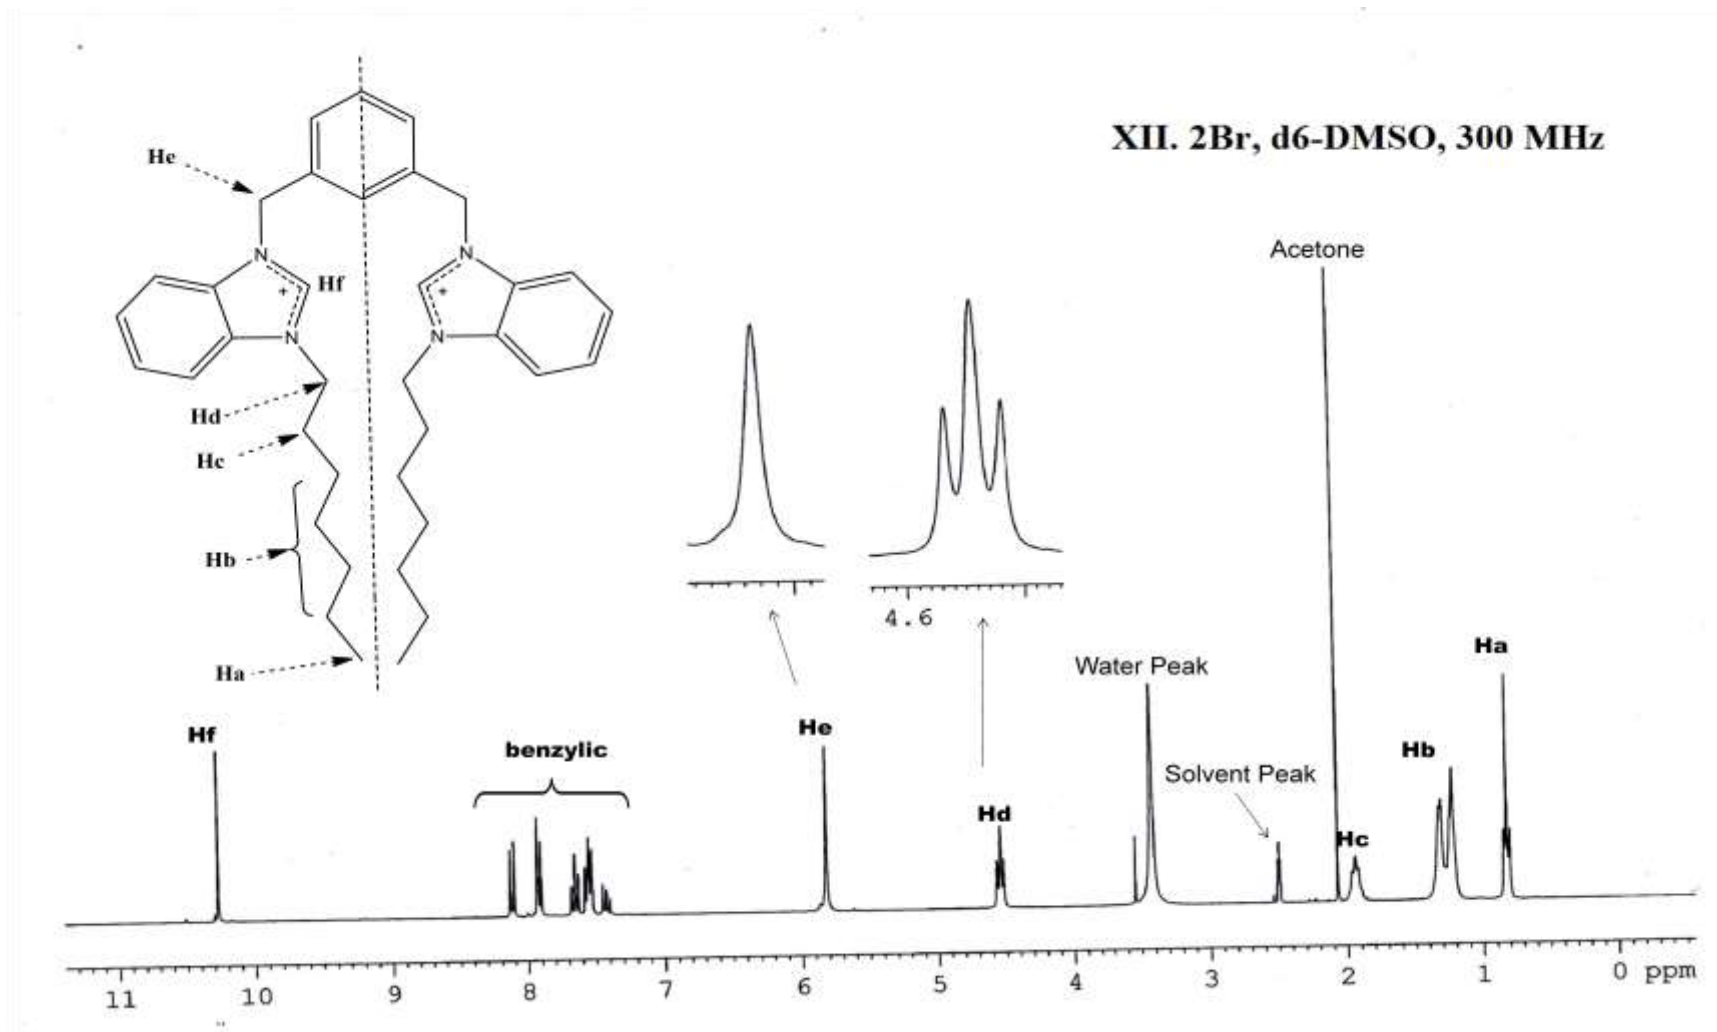

XII. 2Br, d6-DMSO, 300 MHz

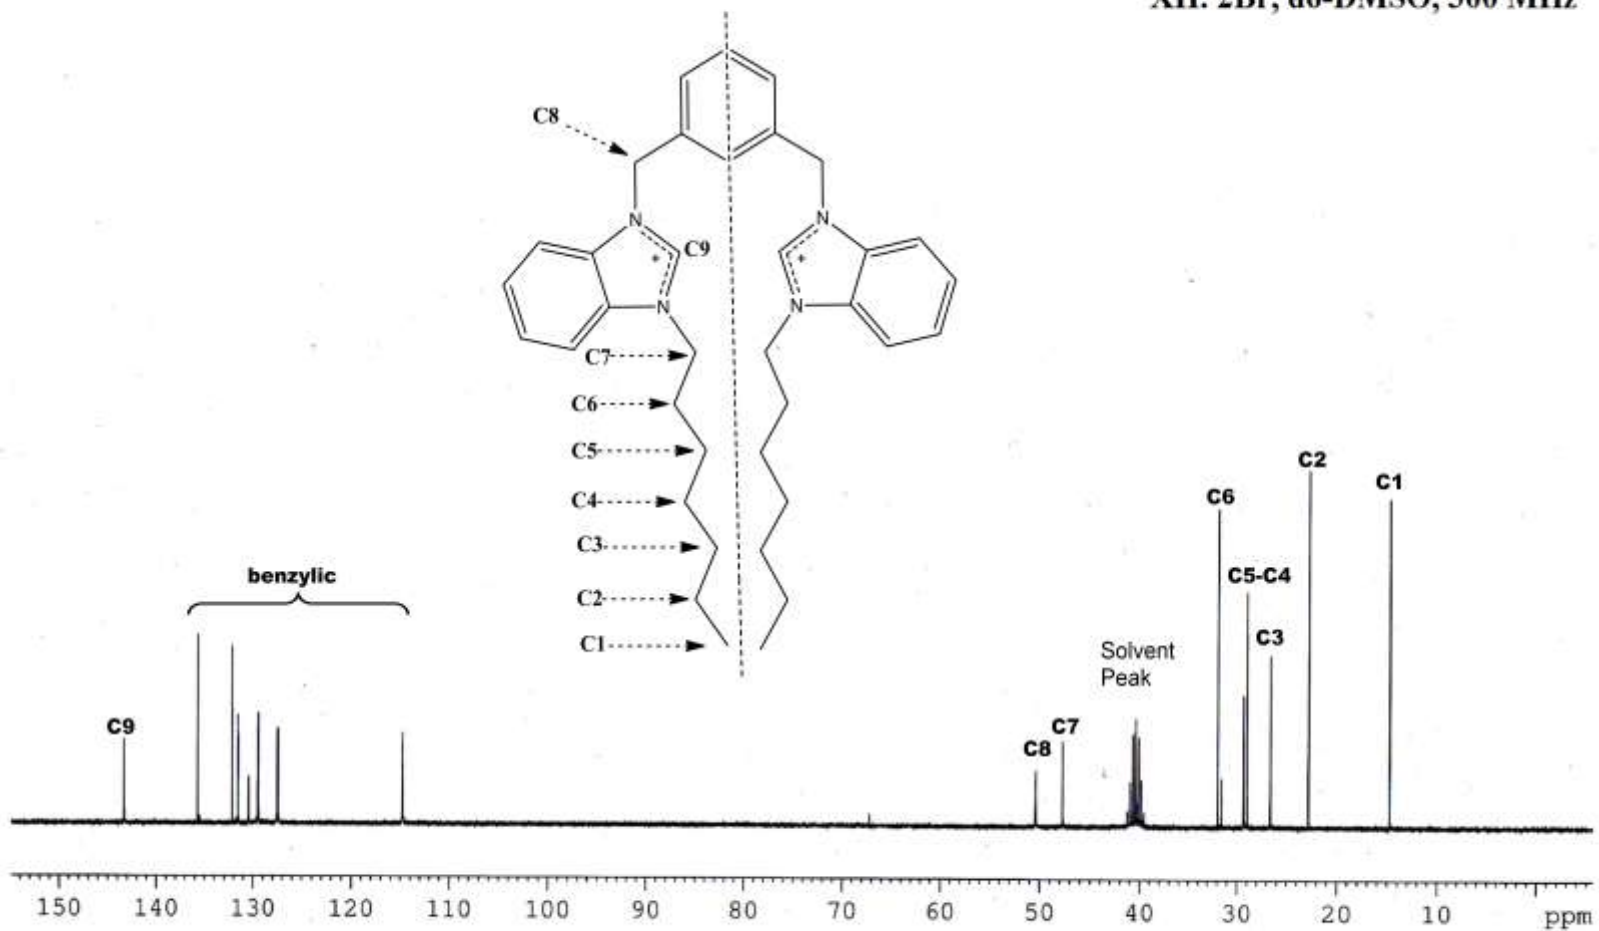

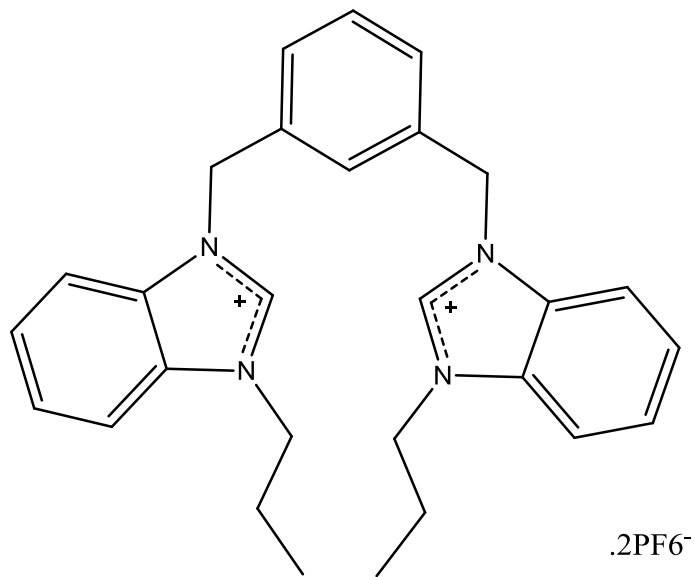

3,3'-(1,3-phenylenebis(methylene))bis(1-propyl-1H-benzimidazolium) salt (**XIII.2PF<sub>6</sub>**)

1. FT-IR
2. <sup>1</sup>HNMR
3. <sup>13</sup>CNMR

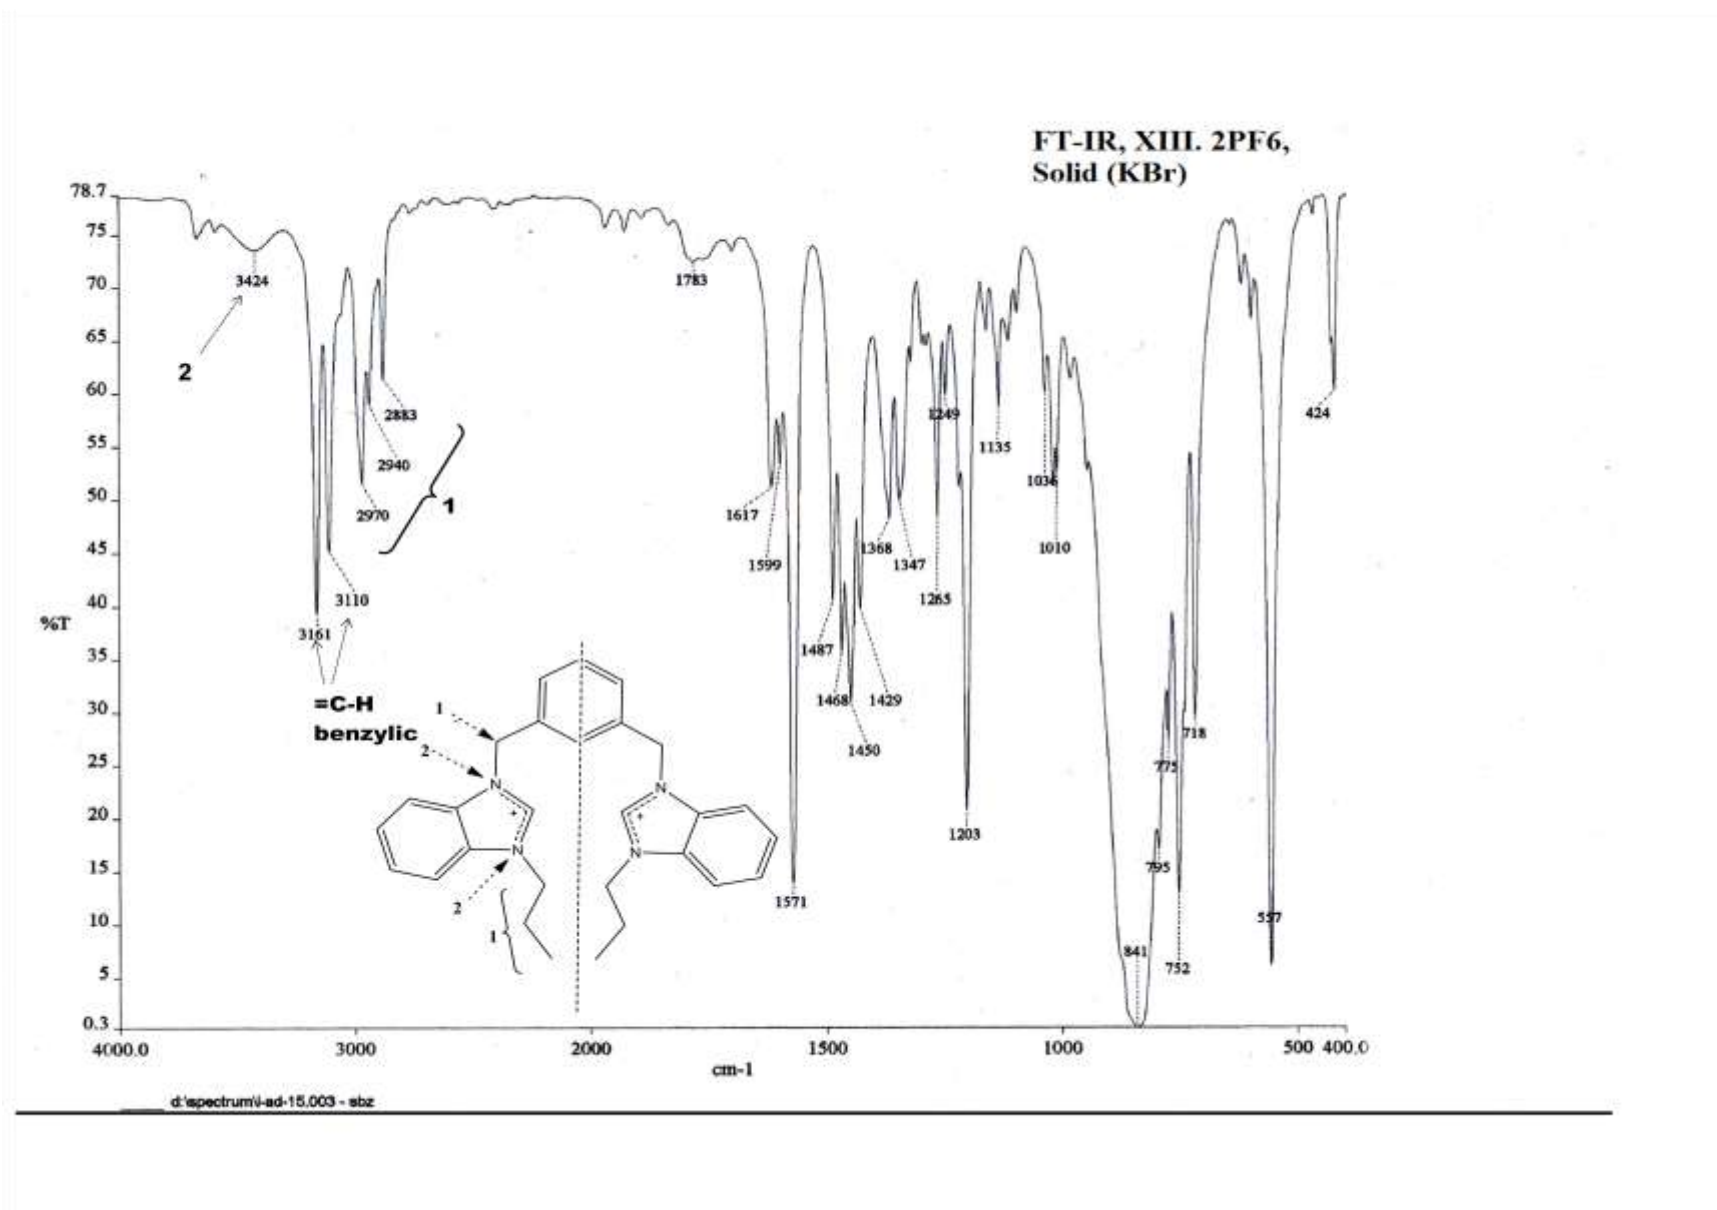

XIII. 2PF6, d6-DMSO, 400 MHz

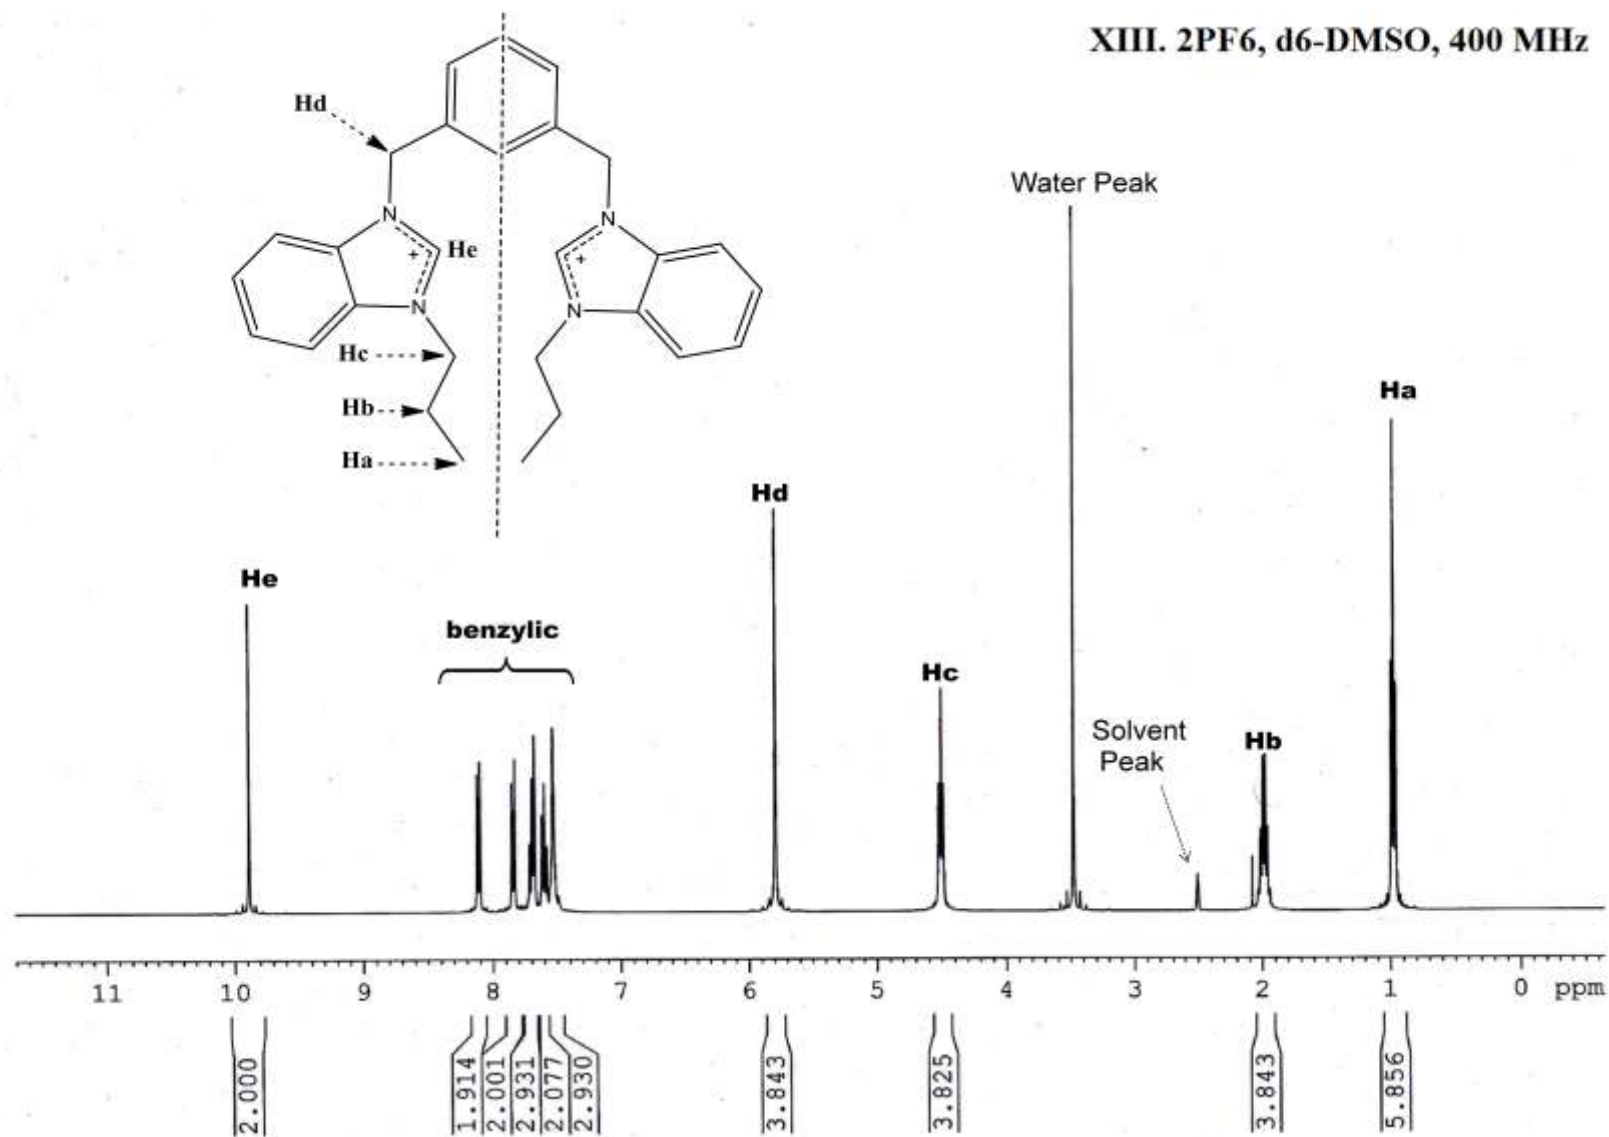

XIII. 2PF6, d6-DMSO, 400 MHz

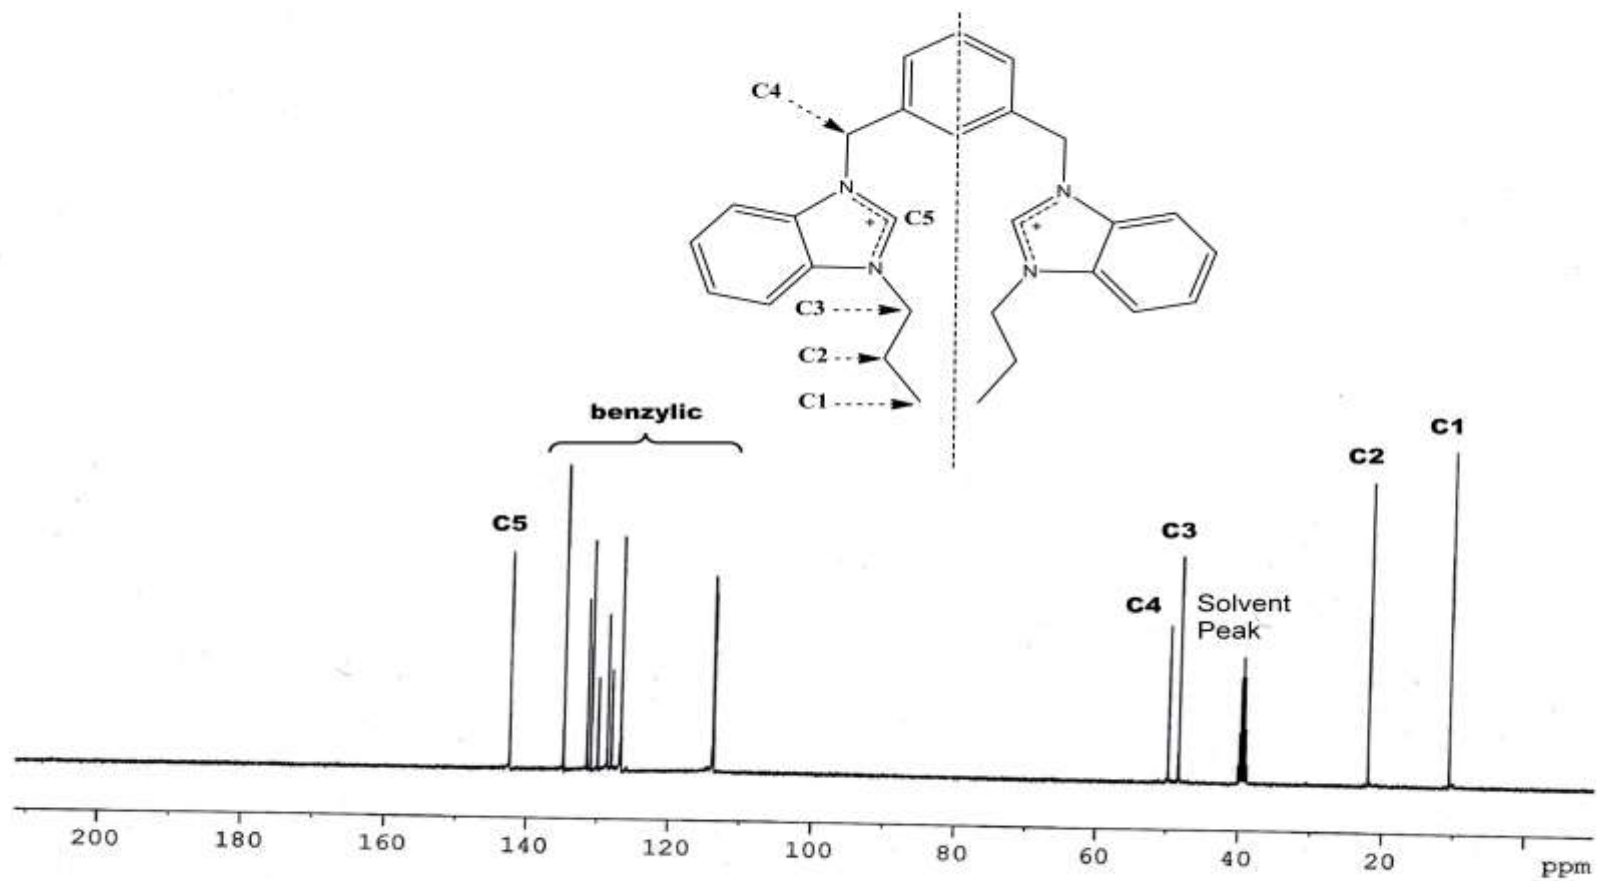

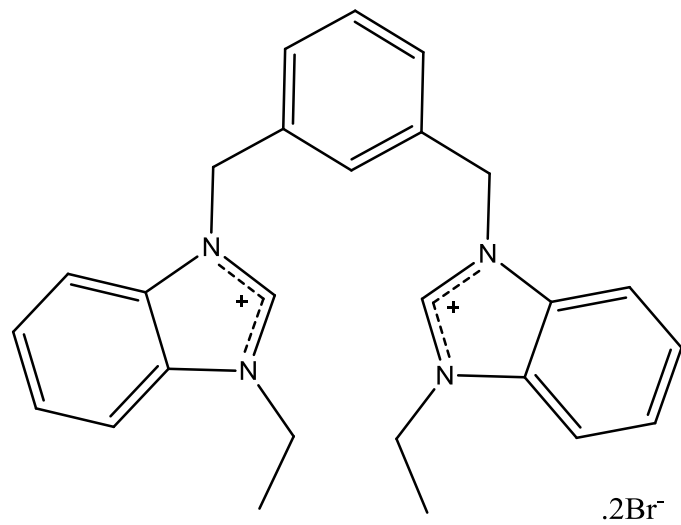

3,3'-(1,3-phenylenebis(methylene))bis(1-ethyl-1H-benzimidazolium) salt (**XIV.2Br**)

1. FT-IR
2. <sup>1</sup>HNMR
3. <sup>13</sup>CNMR

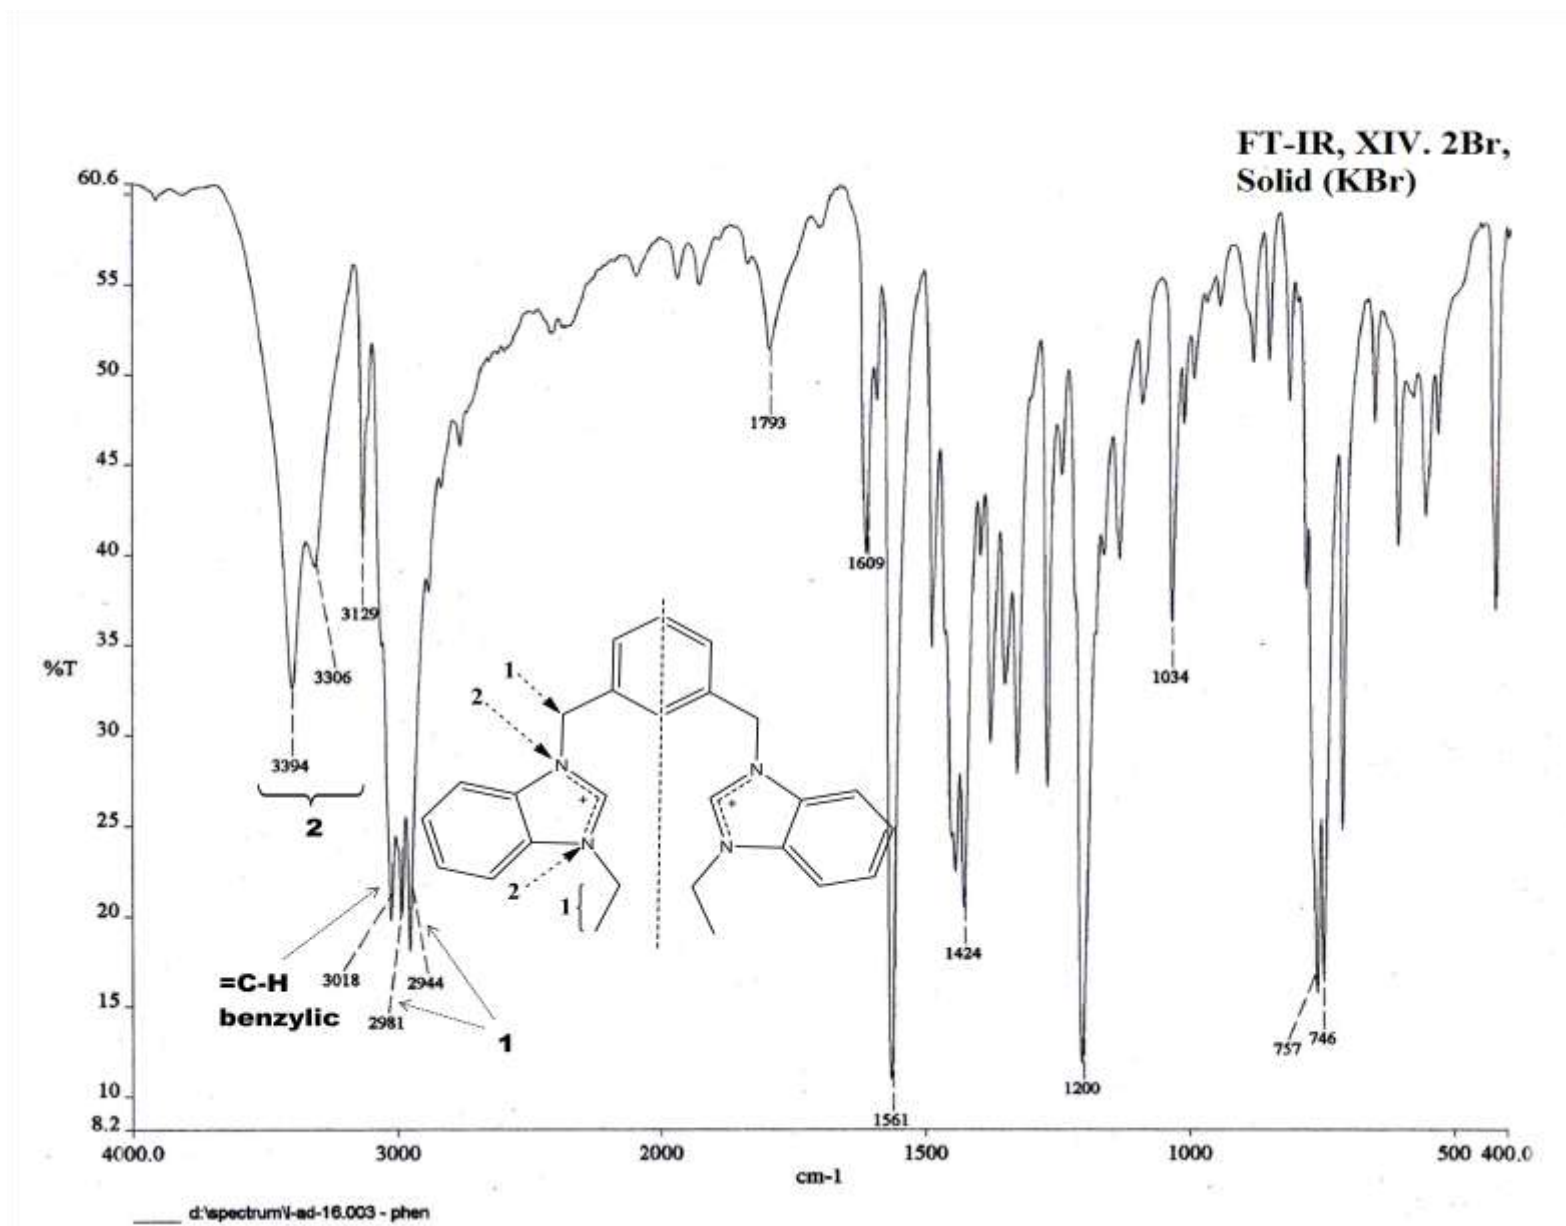



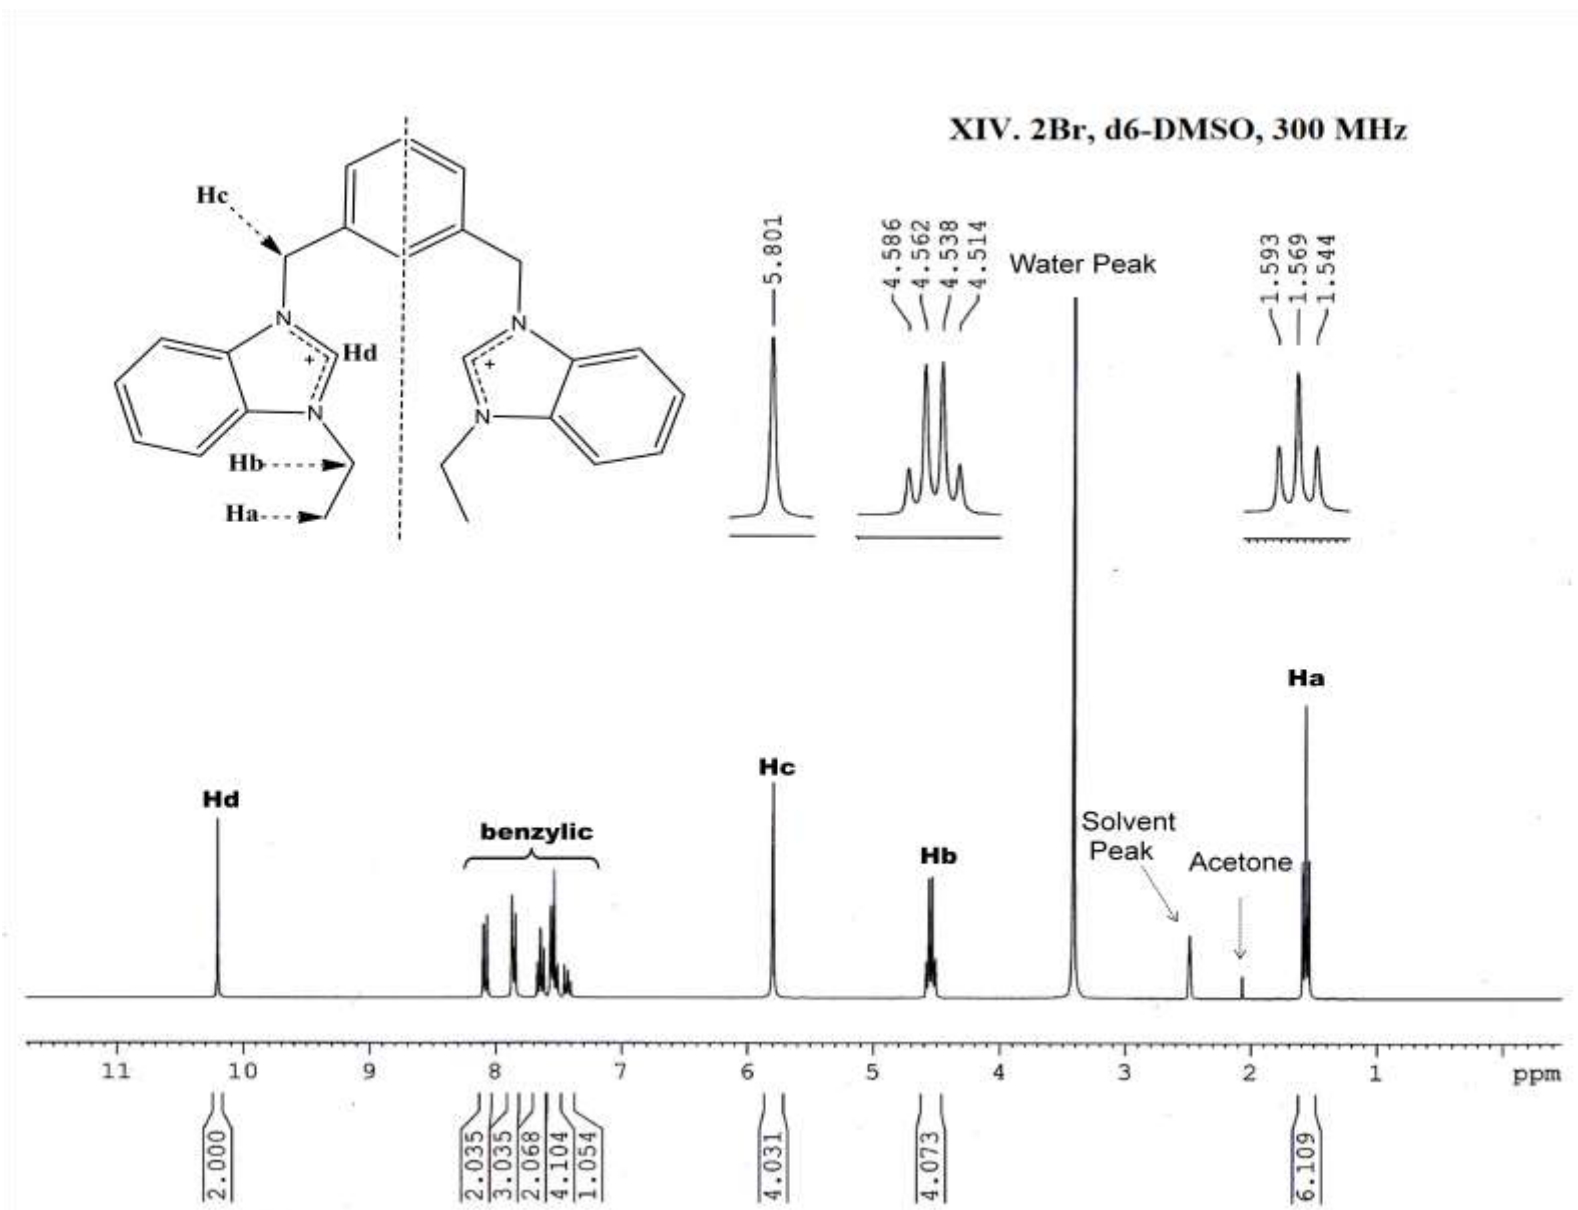

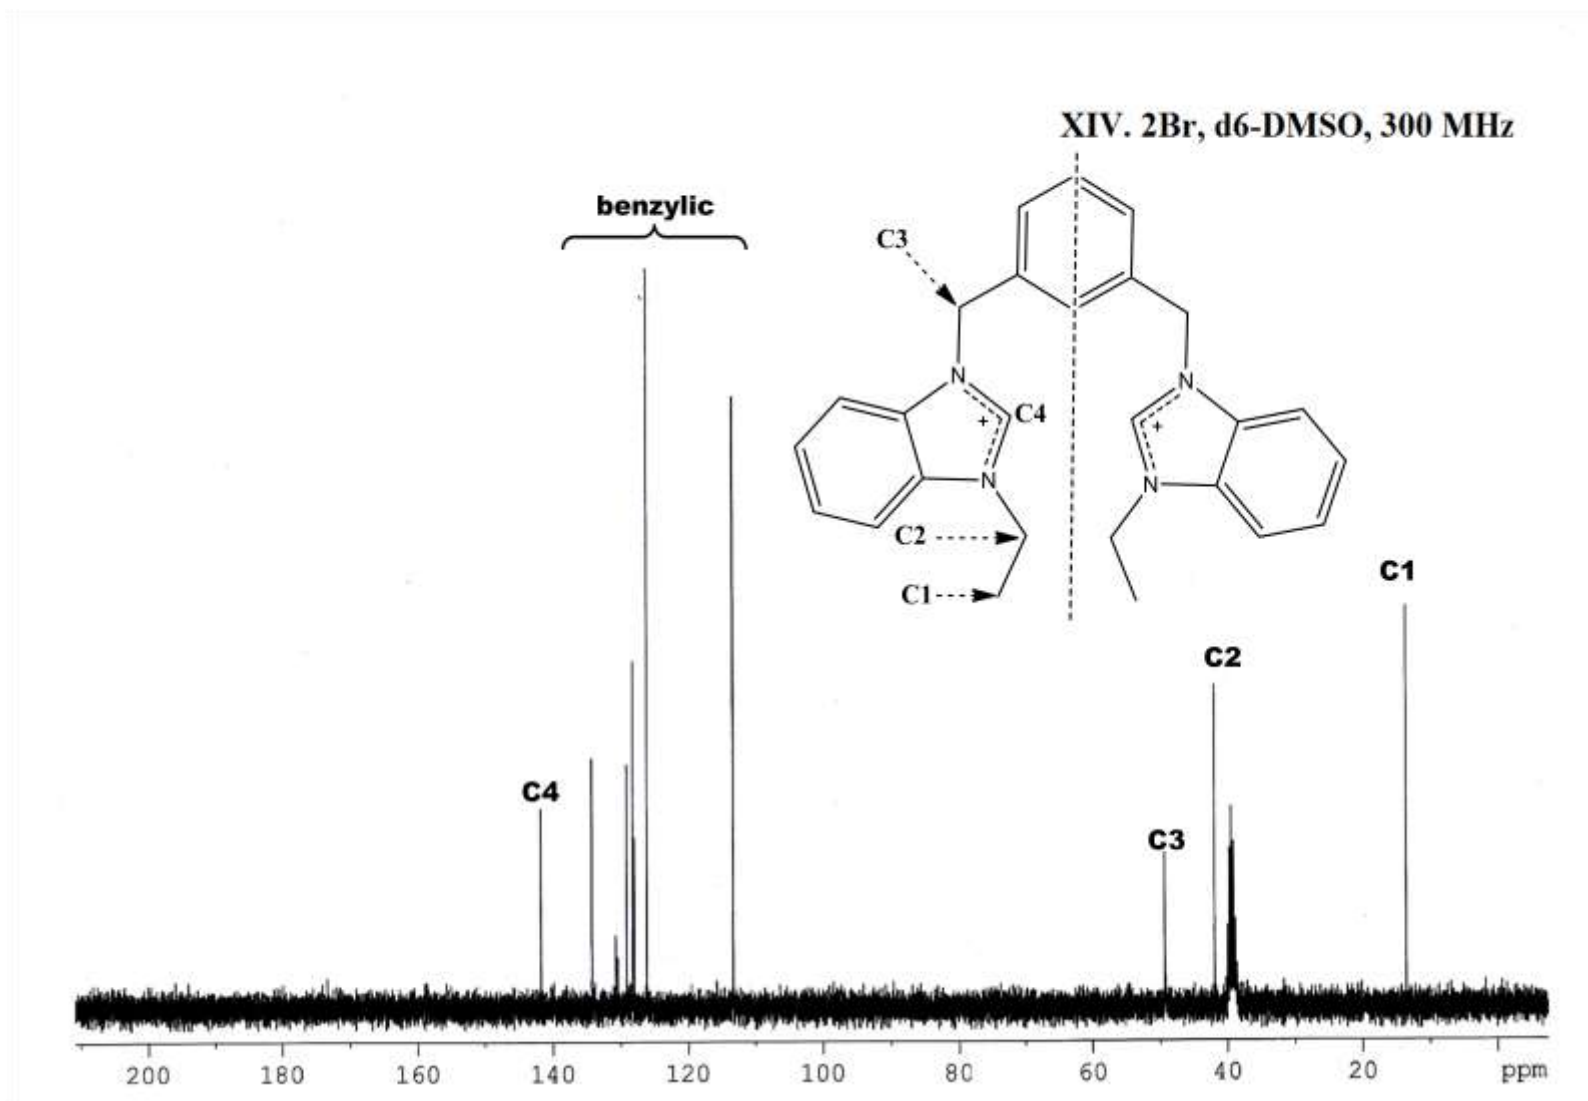

**Note:**

All the spectrums were either scanned or directly saved as electronic copies on MS word from NMR PC and labelled by using MS Power Point, MS Word and ChemBioDraw 12.0.
